# Supplementary material for: Predicted Drosophila Interactome Resource and web tool for functional interpretation of differentially expressed genes
Source: Oxford University Press journal article supplement (doi:10.1093/database/baaa005), 2020-01-01
Supplement: supplementary_table_s1_baaa005.pdf [file supplementary_table_s1_baaa005.pdf]

**Supplementary Table s1. Number of protein-protein interactions and participating unique proteins from three databases.**

| Database | All interactions       |                    | High confidence interactions* |                    | Date           |
|----------|------------------------|--------------------|-------------------------------|--------------------|----------------|
|          | Number of interactions | Number of Proteins | Number of interactions        | Number of Proteins |                |
| BioGrid  | 67728                  | 9063               | 3785                          | 1877               | Dec 25th, 2017 |
| Intact   | 49726                  | 11679              | 422                           | 429                | Dec 12th, 2017 |
| FlyBase  | 55749                  | 5669               | 2102                          | 1507               | Nov 27th,2017  |
| Total    | 155871                 | 13302              | 4434                          | 2155               |                |

\*High confidence interactions: interactions reported in more than two independent studies, at least one of which is low-throughput experiment.
