# Supplementary material for: Predicted Drosophila Interactome Resource and web tool for functional interpretation of differentially expressed genes
Source: Oxford University Press journal article supplement (doi:10.1093/database/baaa005), 2020-01-01
Supplement: supplementary_table_s2_baaa005.pdf [file supplementary_table_s2_baaa005.pdf]

**Supplementary Table s2. Functional association evidence and computing methods.**

| <b>Feature</b>          | <b>Data source/ Data set</b> | <b>Statistics</b>                                                                                                                                                                                                                               |
|-------------------------|------------------------------|-------------------------------------------------------------------------------------------------------------------------------------------------------------------------------------------------------------------------------------------------|
| Shared Annotation       | GOC                          | Cellular component<br>Biological process<br>Molecular function<br>Maximum Shared Annotation Score                                                                                                                                               |
| Homologous Interactions | Inparanoid Score             | Maximum                                                                                                                                                                                                                                         |
| Domain Interaction      | IDDI                         | 3DID<br>IPFAM<br>PINS<br>TW<br>HIMAP<br>DOMAINGA<br>PVALUE<br>IPPRI<br>RCDP<br>DIPD<br>RDFD<br>DPEA<br>ME<br>PE<br>DIMA_STRING<br>KGIDDI<br>LLZ<br>GPE<br>DIMA_DPROF<br>APMM<br>TOPDOWN<br>DIMA_DPEA<br>INTERDOM<br>Maximum Shared Domain Score |
| Co-localization         | Compartments                 | Knowledge channel<br>Experiments channel<br>Text mining channel<br>Predictions channel<br>Cosine Similarity Score                                                                                                                               |
| Co-expression           | COXPRESdb                    | Microarray<br>RNASeq<br>Pearson's Correlation Score                                                                                                                                                                                             |
| Phylogenetic Profile    | DIOPT                        | Mutual Information Score<br>Pearson's Correlation Score<br>Tanimato Correlation Score                                                                                                                                                           |
