# Supplementary material for: Predicted Drosophila Interactome Resource and web tool for functional interpretation of differentially expressed genes
Source: Oxford University Press journal article supplement (doi:10.1093/database/baaa005), 2020-01-01
Supplement: supplementary_table_s3_baaa005.pdf [file supplementary_table_s3_baaa005.pdf]

**Supplementary Table s3. Assessment of feature quality.**

| Evidence                | type Feature              | AUC of ROC | AUC > 0.6 |
|-------------------------|---------------------------|------------|-----------|
| Shared Annotation       | biological_process_value  | 0.873      | Yes       |
|                         | molecular_function_value  | 0.688      | Yes       |
|                         | cellular_component_value  | 0.752      | Yes       |
| Colocation              | integrated_value          | 0.824      | Yes       |
|                         | knowledge_value           | 0.741      | Yes       |
|                         | predictions_value         | 0.663      | Yes       |
|                         | textmining_value          | 0.63       | Yes       |
| Coexpression            | RNAseq_value              | 0.733      | Yes       |
|                         | microarray_value          | 0.731      | Yes       |
| Phylogenetic profile    | phyprofile_tanimato_value | 0.735      | Yes       |
|                         | phyprofile_pearson_value  | 0.721      | Yes       |
|                         | phyprofile_mutual_value   | 0.613      | Yes       |
| Domain Interactions     | INTERDOM_value            | 0.714      | Yes       |
|                         | APMM_value                | 0.639      | Yes       |
|                         | TOPDOWN_value             | 0.658      | Yes       |
|                         | DIMA_DPEA_value           | 0.654      | Yes       |
|                         | GPE_value                 | 0.625      | Yes       |
|                         | PINS_value                | 0.555      | No        |
|                         | LLZ_value                 | 0.518      | No        |
|                         | RDFE_value                | 0.568      | No        |
|                         | DIPD_value                | 0.54       | No        |
|                         | 3DID_value                | 0.579      | No        |
|                         | IPPRI_value               | 0.526      | No        |
|                         | ME_value                  | 0.572      | No        |
|                         | KGIDDI_value              | 0.584      | No        |
|                         | IPFAM_value               | 0.558      | No        |
|                         | DOMAINGA_value            | 0.507      | No        |
|                         | RCDP_value                | 0.525      | No        |
|                         | DIMA_DPROF_value          | 0.546      | No        |
|                         | PVALUE_value              | 0.516      | No        |
|                         | TW_value                  | 0.512      | No        |
|                         | HIMAP_value               | 0.511      | No        |
| PE_value                | 0.563                     | No         |           |
| DIMA_STRING_value       | 0.592                     | No         |           |
| DPEA_value              | 0.528                     | No         |           |
| Homologous interactions | inparanoid_value          | 0.555      | No        |
