# Supplementary material for: Predicted Drosophila Interactome Resource and web tool for functional interpretation of differentially expressed genes
Source: Oxford University Press journal article supplement (doi:10.1093/database/baaa005), 2020-01-01
Supplement: supplementary_table_s4_baaa005.pdf [file supplementary_table_s4_baaa005.pdf]

**Supplementary Table s4. Evaluation of the predicted interactions in different datasets.**

| DataSet | Coverage* | Reliability <sup>#</sup> |
|---------|-----------|--------------------------|
| STRING  | 53.12%    | 2.93%                    |
| DroID   | 15.36%    | 8.14%                    |
| PDIR    | 22.56%    | 50.51%                   |
| MIST    | 39.31%    | 12.69%                   |

\* Coverage measures how much proportion of the 559 new interactions published after Dec 31, 2017 were included in the dataset.

# Reliability measures how much proportion of the interactome were expected to be protein interactions. The expected number of protein interactions covered by an interactome was estimated as its coverage estimated above times the expected sized of Drosophila interactome ( $2.24 \times 10^5$ , see main text).
