# Supplementary material for: Predicted Drosophila Interactome Resource and web tool for functional interpretation of differentially expressed genes
Source: Oxford University Press journal article supplement (doi:10.1093/database/baaa005), 2020-01-01
Supplement: supplementary_table_s5_baaa005.pdf [file supplementary_table_s5_baaa005.pdf]

**Supplementary Table s5. Annotations produced by the GO enrichment analysis tool for the observed CGS between the Apc1 mutant and wild type.**

|                                             |                                                     |                |                     |                       |                            |                        |                |
|---------------------------------------------|-----------------------------------------------------|----------------|---------------------|-----------------------|----------------------------|------------------------|----------------|
| Analysis Type:                              | PANTHER Overrepresentation Test (Released 20190711) |                |                     |                       |                            |                        |                |
| Annotation Version and Release Date:        | GO Ontology database Released 2019-07-03            |                |                     |                       |                            |                        |                |
| Analyzed List:                              | upload_1 (Drosophila melanogaster)                  |                |                     |                       |                            |                        |                |
| Reference List:                             | Drosophila melanogaster (all genes in database)     |                |                     |                       |                            |                        |                |
| Test Type:                                  | FISHER                                              |                |                     |                       |                            |                        |                |
| Correction:                                 | FDR                                                 |                |                     |                       |                            |                        |                |
| GO biological process complete              | Drosophila melanogaster - REFLIST (13767)           | upload_1 (158) | upload_1 (expected) | upload_1 (over/under) | upload_1 (fold Enrichment) | upload_1 (raw P-value) | upload_1 (FDR) |
| antibacterial humoral response (GO:0019731) | 27                                                  | 6              | 0.31                | +                     | 19.36                      | 1.67E-06               | 1.31E-02       |
