# Supplementary material for: Predicted Drosophila Interactome Resource and web tool for functional interpretation of differentially expressed genes
Source: Oxford University Press journal article supplement (doi:10.1093/database/baaa005), 2020-01-01
Supplement: supplementary_table_s6_baaa005.pdf [file supplementary_table_s6_baaa005.pdf]

**Supplementary Table s6. Annotations produced by DAVID for the observed CGS between the Apc1 mutant and wild type.**

| Annotation Cluster 1<br>Category | Enrichment Score: 5.261167414991856<br>Term                       | Count | %          | PValue   | Genes                                                                                                                       | List Total | Pop Hits | Pop Total | Fold Enrichment | Bonferroni | Benjamini  | FDR        | Included for comparison (Top 20 significance) |
|----------------------------------|-------------------------------------------------------------------|-------|------------|----------|-----------------------------------------------------------------------------------------------------------------------------|------------|----------|-----------|-----------------|------------|------------|------------|-----------------------------------------------|
| INTERPRO                         | IPR002334:Dol/Ves 1 allergen                                      | 6     | 2.53164557 | 4.84E-08 | CG17191, CG6271, CG6283, CG6295, CG6296, CG17192                                                                            | 210        | 7        | 10984     | 44.83265306     | 1.84E-05   | 1.84E-05   | 6.71E-05   | N                                             |
| GOTERM_MF_DIRECT                 | GO:0052740-1-acyl-2-lysophosphatidylserine acylhydrolase activity | 6     | 2.53164557 | 1.87E-07 | CG17191, CG6271, CG6283, CG6295, CG6296, CG17192                                                                            | 164        | 9        | 9284      | 37.7398374      | 3.89E-05   | 3.89E-05   | 2.36E-04   | Y                                             |
| GOTERM_MF_DIRECT                 | GO:0052739-phosphatidylserine 1-acylhydrolase activity            | 6     | 2.53164557 | 1.87E-07 | CG17191, CG6271, CG6283, CG6295, CG6296, CG17192                                                                            | 164        | 9        | 9284      | 37.7398374      | 3.89E-05   | 3.89E-05   | 2.36E-04   | Y                                             |
| GOTERM_MF_DIRECT                 | GO:0008970-phosphatidylcholine 1-acylhydrolase activity           | 6     | 2.53164557 | 1.87E-07 | CG17191, CG6271, CG6283, CG6295, CG6296, CG17192                                                                            | 164        | 9        | 9284      | 37.7398374      | 3.89E-05   | 3.89E-05   | 2.36E-04   | Y                                             |
| GOTERM_BP_DIRECT                 | GO:0016042-lipid catabolic process                                | 8     | 3.37552743 | 2.37E-05 | CG2772, CG17191, CG6271, CG31091, CG6283, CG6295, CG6296, CG17192                                                           | 182        | 53       | 10996     | 9.119635082     | 0.01066386 | 0.00534622 | 0.03366616 | Y                                             |
| UP_KEYWORDS                      | Secreted                                                          | 17    | 7.17299578 | 2.84E-05 | HH, CECC, DEF, EPSILONTRY, THETATRY, CG6283, ATTA, CG6295, CG6296, CG17192, IM3, BETATRY, CG6271, CG17191, CCHA1, MTK, TOTC | 235        | 287      | 13921     | 3.508888724     | 0.0037765  | 0.00126042 | 0.03325868 | N                                             |
| GOTERM_MF_DIRECT                 | GO:0016298-lipase activity                                        | 6     | 2.53164557 | 1.57E-04 | CG17191, CG6271, CG6283, CG6295, CG6296, CG17192                                                                            | 164        | 30       | 9284      | 11.32195122     | 0.03207452 | 0.01616796 | 0.1975127  | Y                                             |
| INTERPRO                         | IPR000734:Lipase                                                  | 6     | 2.53164557 | 3.66E-04 | CG17191, CG6271, CG6283, CG6295, CG6296, CG17192                                                                            | 210        | 33       | 10984     | 9.50995671      | 0.13004485 | 0.03422888 | 0.50512127 | N                                             |
| INTERPRO                         | IPR013818:Lipase, N-terminal                                      | 6     | 2.53164557 | 3.66E-04 | CG17191, CG6271, CG6283, CG6295, CG6296, CG17192                                                                            | 210        | 33       | 10984     | 9.50995671      | 0.13004485 | 0.03422888 | 0.50512127 | N                                             |
| Annotation Cluster 2<br>Category | Enrichment Score: 4.375939730686171<br>Term                       | Count | %          | PValue   | Genes                                                                                                                       | List Total | Pop Hits | Pop Total | Fold Enrichment | Bonferroni | Benjamini  | FDR        | Included for comparison (Top 20 significance) |
| SMART                            | SM00587:CHK                                                       | 9     | 3.79746835 | 1.28E-06 | CG13658, CG9259, CG13360, CG10514, CG11892, CG33510, CG11893, CG6908, CHKOV1                                                | 86         | 51       | 5218      | 10.70725034     | 9.34E-05   | 9.34E-05   | 0.00133604 | N                                             |
| INTERPRO                         | IPR015897:CHK kinase-like                                         | 9     | 3.79746835 | 4.74E-06 | CG13658, CG9259, CG13360, CG10514, CG11892, CG33510, CG11893, CG6908, CHKOV1                                                | 210        | 51       | 10984     | 9.230252101     | 0.00180383 | 6.02E-04   | 0.00656258 | N                                             |
| INTERPRO                         | IPR004119:Protein of unknown function DUF227                      | 9     | 3.79746835 | 4.74E-06 | CG13658, CG9259, CG13360, CG10514, CG11892, CG33510, CG11893, CG6908, CHKOV1                                                | 210        | 51       | 10984     | 9.230252101     | 0.00180383 | 6.02E-04   | 0.00656258 | N                                             |
| INTERPRO                         | IPR011009:Protein kinase-like domain                              | 10    | 4.21940928 | 0.109071 | CG13658, CG9259, CG13360, CG10514, TAKL2, CG11892, CG33510, CG11893, CG6908, CHKOV1                                         | 210        | 294      | 10984     | 1.779073534     | 1          | 0.86467682 | 79.7994397 | N                                             |
| Annotation Cluster 3<br>Category | Enrichment Score: 2.7029011380582055<br>Term                      | Count | %          | PValue   | Genes                                                                                                                       | List Total | Pop Hits | Pop Total | Fold Enrichment | Bonferroni | Benjamini  | FDR        | Included for comparison (Top 20 significance) |
| SMART                            | SM00631:Zn_pept                                                   | 5     | 2.10970464 | 3.84E-04 | CG8560, CG8562, CG8539, CG12374, CG18417                                                                                    | 86         | 22       | 5218      | 13.78964059     | 0.02761704 | 0.0139052  | 0.39963795 | N                                             |
| UP_KEYWORDS                      | Carboxypeptidase                                                  | 6     | 2.53164557 | 4.10E-04 | CG8560, CG8562, CG32483, CG8539, CG12374, CG18417                                                                           | 235        | 38       | 13921     | 9.353415454     | 0.05313364 | 0.00905828 | 0.47884572 | N                                             |
| GOTERM_MF_DIRECT                 | GO:0004181-metalloproteinase activity                             | 5     | 2.10970464 | 6.25E-04 | CG8560, CG8562, CG8539, CG12374, CG18417                                                                                    | 164        | 23       | 9284      | 12.30646872     | 0.12192132 | 0.04241395 | 0.78541692 | Y                                             |
| INTERPRO                         | IPR000834:Peptidase M14, carboxypeptidase A                       | 5     | 2.10970464 | 8.49E-04 | CG8560, CG8562, CG8539, CG12374, CG18417                                                                                    | 210        | 23       | 10984     | 11.37060041     | 0.27645777 | 0.06266944 | 1.16937329 | N                                             |
| INTERPRO                         | IPR003146:Proteinase inhibitor, carboxypeptidase propeptide       | 4     | 1.68776371 | 0.003792 | CG8560, CG8562, CG12374, CG18417                                                                                            | 210        | 17       | 10984     | 12.3070028      | 0.76484794 | 0.18680877 | 5.12567587 | N                                             |
| INTERPRO                         | IPR009020:Proteinase inhibitor, propeptide                        | 4     | 1.68776371 | 0.006096 | CG8560, CG8562, CG12374, CG18417                                                                                            | 210        | 20       | 10984     | 10.46095238     | 0.90268236 | 0.22807192 | 8.11999054 | N                                             |
| UP_KEYWORDS                      | Metalloprotease                                                   | 4     | 1.68776371 | 0.062228 | CG8560, CG8562, CG12374, CG18417                                                                                            | 235        | 54       | 13921     | 4.388022065     | 0.99980548 | 0.33429224 | 52.8218268 | N                                             |
| Annotation Cluster 4<br>Category | Enrichment Score: 2.5149381300535785<br>Term                      | Count | %          | PValue   | Genes                                                                                                                       | List Total | Pop Hits | Pop Total | Fold Enrichment | Bonferroni | Benjamini  | FDR        | Included for comparison (Top 20 significance) |
| KEGG_PATHWAY                     | dme00983:Drug metabolism - other enzymes                          | 7     | 2.9535865  | 4.57E-05 | UGT86DI, UGT37B1, UGT86DG, UGT35B, RY, CG8353, CG5999                                                                       | 41         | 47       | 2737      | 9.942397509     | 0.00209926 | 0.00209926 | 0.04317034 | N                                             |
| KEGG_PATHWAY                     | dme00830:Retinol metabolism                                       | 6     | 2.53164557 | 6.63E-05 | UGT86DI, UGT37B1, UGT86DG, UGT35B, CG10672, CG5999                                                                          | 41         | 31       | 2737      | 12.92053501     | 0.00304625 | 0.00152429 | 0.06266836 | N                                             |
| KEGG_PATHWAY                     | dme00982:Drug metabolism - cytochrome P450                        | 7     | 2.9535865  | 2.03E-04 | UGT86DI, UGT37B1, UGT86DG, UGT35B, GSTD5, GSTE9, CG5999                                                                     | 41         | 61       | 2737      | 7.660535786     | 0.00930326 | 0.00311075 | 0.19186844 | N                                             |
| KEGG_PATHWAY                     | dme00980:Metabolism of xenobiotics by cytochrome P450             | 7     | 2.9535865  | 2.03E-04 | UGT86DI, UGT37B1, UGT86DG, UGT35B, GSTD5, GSTE9, CG5999                                                                     | 41         | 61       | 2737      | 7.660535786     | 0.00930326 | 0.00311075 | 0.19186844 | N                                             |

|                      |                                                               |       |            |          |                                                                                                                                                                                                              |            |          |           |                 |            |            |            |                                               |
|----------------------|---------------------------------------------------------------|-------|------------|----------|--------------------------------------------------------------------------------------------------------------------------------------------------------------------------------------------------------------|------------|----------|-----------|-----------------|------------|------------|------------|-----------------------------------------------|
| KEGG_PATHWAY         | dme00040:Uridine and glucuronate interconversions             | 6     | 2.53164557 | 3.30E-04 | UGT86DI, UGT37B1, UGT86DG, UGT35B, CG5999, CG10863                                                                                                                                                           | 41         | 43       | 2737      | 9.314804311     | 0.01508322 | 0.00379232 | 0.31179511 | N                                             |
| KEGG_PATHWAY         | dme00053:Ascorbate and aldarate metabolism                    | 5     | 2.10970464 | 8.15E-04 | UGT86DI, UGT37B1, UGT86DG, UGT35B, CG5999                                                                                                                                                                    | 41         | 30       | 2737      | 11.12601626     | 0.03683085 | 0.00747715 | 0.76810172 | N                                             |
| GOTERM_BP_DIRECT     | GO:0052696--flavonoid glucuronidation                         | 5     | 2.10970464 | 0.002239 | UGT86DI, UGT37B1, UGT86DG, UGT35B, CG5999                                                                                                                                                                    | 182        | 34       | 10996     | 8.884938591     | 0.63695354 | 0.18343184 | 3.13213241 | Y                                             |
| GOTERM_BP_DIRECT     | GO:0009813--flavonoid biosynthetic process                    | 5     | 2.10970464 | 0.002239 | UGT86DI, UGT37B1, UGT86DG, UGT35B, CG5999                                                                                                                                                                    | 182        | 34       | 10996     | 8.884938591     | 0.63695354 | 0.18343184 | 3.13213241 | Y                                             |
| KEGG_PATHWAY         | dme00860:Porphyrin and chlorophyll metabolism                 | 5     | 2.10970464 | 0.002935 | UGT86DI, UGT37B1, UGT86DG, UGT35B, CG5999                                                                                                                                                                    | 41         | 42       | 2737      | 7.947154472     | 0.12646216 | 0.02228198 | 2.73985462 | N                                             |
| GOTERM_MF_DIRECT     | GO:0008194--UDP-glycosyltransferase activity                  | 5     | 2.10970464 | 0.003482 | UGT86DI, UGT37B1, UGT86DG, UGT35B, CG5999                                                                                                                                                                    | 164        | 36       | 9284      | 7.862466125     | 0.51595086 | 0.13507611 | 4.30489748 | Y                                             |
| INTERPRO             | IPR002213:UDP-glucuronosyl/UDP-glycosyltransferase            | 5     | 2.10970464 | 0.004202 | UGT86DI, UGT37B1, UGT86DG, UGT35B, CG5999                                                                                                                                                                    | 210        | 35       | 10984     | 7.472108844     | 0.79894095 | 0.18169453 | 5.66431691 | N                                             |
| GOTERM_MF_DIRECT     | GO:0016758--transferase activity, transferring hexosyl groups | 5     | 2.10970464 | 0.0061   | UGT86DI, UGT37B1, UGT86DG, UGT35B, CG5999                                                                                                                                                                    | 164        | 42       | 9284      | 6.739256678     | 0.71993176 | 0.19113264 | 7.42822325 | Y                                             |
| GOTERM_MF_DIRECT     | GO:0015020--glucuronosyltransferase activity                  | 4     | 1.68776371 | 0.013893 | UGT86DI, UGT86DG, UGT35B, CG5999                                                                                                                                                                             | 164        | 29       | 9284      | 7.80824222      | 0.94551921 | 0.34012246 | 16.1780342 | Y                                             |
| GOTERM_CC_DIRECT     | GO:0043231--intracellular membrane-bounded organelle          | 5     | 2.10970464 | 0.024069 | UGT86DI, UGT37B1, UGT86DG, UGT35B, CG5999                                                                                                                                                                    | 168        | 66       | 10026     | 4.521103896     | 0.88838899 | 0.35502719 | 23.282994  | N                                             |
| GOTERM_BP_DIRECT     | GO:0008152--metabolic process                                 | 6     | 2.53164557 | 0.093254 | UGT86DI, UGT86DG, CG5361, CG4594, CG4830, CG5999                                                                                                                                                             | 182        | 146      | 10996     | 2.482914346     | 1          | 0.92593349 | 75.0844809 | N                                             |
| UP_KEYWORDS          | Glycosyltransferase                                           | 6     | 2.53164557 | 0.145482 | UGT86DI, UGT37B1, UGT86DG, UGT35B, L(2)K12914, CG5999                                                                                                                                                        | 235        | 165      | 13921     | 2.154119923     | 1          | 0.49059543 | 84.09135   | N                                             |
| UP_KEYWORDS          | Transferase                                                   | 15    | 6.32911392 | 0.877964 | UGT37B1, AKAP200, UGT86DI, UGT86DG, UGT35B, CG31522, CG1946, CG5999, CG10344, CG1894, GSTD5, TAKL2, GFAT1, L(2)K12914, GSTE9                                                                                 | 235        | 1081     | 13921     | 0.821993032     | 1          | 0.99323284 | 100        | N                                             |
| Annotation Cluster 5 | Enrichment Score: 2.3004014201024727                          |       |            |          |                                                                                                                                                                                                              |            |          |           |                 |            |            |            |                                               |
| Category             | Term                                                          | Count | %          | PValue   | Genes                                                                                                                                                                                                        | List Total | Pop Hits | Pop Total | Fold Enrichment | Bonferroni | Benjamini  | FDR        | Included for comparison (Top 20 significance) |
| GOTERM_BP_DIRECT     | GO:0006508--proteolysis                                       | 24    | 10.1265823 | 3.21E-06 | SDA, JON99CI, SWIM, BACE, CG32483, EPSILONTRY, THETATRY, CG8539, CG1304, PCL, JON25BII, CG30090, CG3734, CG8560, ADAMTS-A, BETATRY, JON25BI, CG8562, CG6337, JON65AII, CG14528, CG11912, CG12374, CG18417    | 182        | 475      | 10996     | 3.052677848     | 0.00145103 | 0.00145103 | 0.00456044 | Y                                             |
| UP_KEYWORDS          | Protease                                                      | 19    | 8.01687764 | 4.13E-05 | HH, SDA, JON99CI, BACE, CG32483, EPSILONTRY, THETATRY, CG8539, PCL, JON25BII, CG30090, CG8560, BETATRY, JON25BI, CG8562, JON65AII, CG11912, CG12374, CG18417                                                 | 235        | 362      | 13921     | 3.10919243      | 0.00548416 | 0.00137387 | 0.04833538 | N                                             |
| UP_KEYWORDS          | Disulfide bond                                                | 26    | 10.9704641 | 1.59E-04 | DEF, EPSILONTRY, FZ, THETATRY, IM3, CG8560, JON25BI, LPR1, CG8562, MEW, JON99CI, CG1304, JON25BII, CG12950, LYSX, CG30090, CG5731, ADAMTS-A, BETATRY, FZ3, CCHA1, MTHL8, JON65AII, CG11912, CG12374, CG18417 | 235        | 670      | 13921     | 2.298799619     | 0.02089667 | 0.00421471 | 0.18548889 | N                                             |
| UP_SEQ_FEATURE       | domain:Peptidase S1                                           | 4     | 1.68776371 | 0.001854 | BETATRY, JON99CI, EPSILONTRY, THETATRY                                                                                                                                                                       | 45         | 18       | 3113      | 15.37283951     | 0.2678916  | 0.14436666 | 2.23455539 | N                                             |
| UP_KEYWORDS          | Serine protease                                               | 9     | 3.79746835 | 0.003406 | BETATRY, JON25BI, JON99CI, EPSILONTRY, THETATRY, JON65AII, JON25BII, CG30090, CG11912                                                                                                                        | 235        | 147      | 13921     | 3.626834564     | 0.36480232 | 0.04917413 | 3.9112361  | N                                             |
| UP_SEQ_FEATURE       | site:Required for specificity                                 | 3     | 1.26582278 | 0.008177 | BETATRY, EPSILONTRY, THETATRY                                                                                                                                                                                | 45         | 10       | 3113      | 20.75333333     | 0.74827318 | 0.36859237 | 9.51354071 | N                                             |
| INTERPRO             | IPR018114:Peptidase S1, trypsin family, active site           | 10    | 4.21940928 | 0.009175 | BETATRY, JON25BI, JON99CI, EPSILONTRY, THETATRY, CG1304, JON65AII, JON25BII, CG30090, CG11912                                                                                                                | 210        | 186      | 10984     | 2.812083973     | 0.97015471 | 0.29613791 | 11.9838965 | N                                             |
| UP_SEQ_FEATURE       | disulfide bond                                                | 10    | 4.21940928 | 0.01018  | IM3, FZ3, BETATRY, JON99CI, DEF, EPSILONTRY, FZ, THETATRY, MTHL8, LYSX                                                                                                                                       | 45         | 265      | 3113      | 2.61048218      | 0.82076732 | 0.34933971 | 11.7137756 | N                                             |
| UP_SEQ_FEATURE       | active site:Charge relay system                               | 4     | 1.68776371 | 0.011618 | BETATRY, JON99CI, EPSILONTRY, THETATRY                                                                                                                                                                       | 45         | 34       | 3113      | 8.138562092     | 0.85959999 | 0.32473626 | 13.2624433 | N                                             |
| KEGG_PATHWAY         | dme04080:Neuroactive ligand-receptor interaction              | 4     | 1.68776371 | 0.013696 | BETATRY, EPSILONTRY, THETATRY, DH31-R                                                                                                                                                                        | 41         | 35       | 2737      | 7.629268293     | 0.46974284 | 0.0680612  | 12.2213051 | N                                             |
| UP_SEQ_FEATURE       | propeptide:Activation peptide                                 | 3     | 1.26582278 | 0.013798 | BETATRY, EPSILONTRY, THETATRY                                                                                                                                                                                | 45         | 13       | 3113      | 15.96410256     | 0.90310509 | 0.32228022 | 15.5627182 | N                                             |
| SMART                | SM00020:Tryp_SpC                                              | 10    | 4.21940928 | 0.0206   | BETATRY, JON25BI, JON99CI, EPSILONTRY, THETATRY, CG1304, JON65AII, JON25BII, CG30090, CG11912                                                                                                                | 86         | 252      | 5218      | 2.407715024     | 0.78117263 | 0.3973934  | 19.5281146 | N                                             |
| UP_KEYWORDS          | Zymogen                                                       | 4     | 1.68776371 | 0.025676 | BETATRY, JON99CI, EPSILONTRY, THETATRY                                                                                                                                                                       | 235        | 38       | 13921     | 6.235610302     | 0.96855356 | 0.18412833 | 26.2243563 | N                                             |

|                      |                                                         |       |            |          |                                                                                                                                                                                                                                                                                                                                                                                                                                                                                                                                                                                         |            |          |           |                 |            |            |            |                                               |
|----------------------|---------------------------------------------------------|-------|------------|----------|-----------------------------------------------------------------------------------------------------------------------------------------------------------------------------------------------------------------------------------------------------------------------------------------------------------------------------------------------------------------------------------------------------------------------------------------------------------------------------------------------------------------------------------------------------------------------------------------|------------|----------|-----------|-----------------|------------|------------|------------|-----------------------------------------------|
| INTERPRO             | IPR001314:Peptidase S1A, chymotrypsin-type              | 10    | 4.21940928 | 0.031053 | BETATRY, JON25BI, JON99CI, EPSILONTRY, THETATRY, CG1304, JON65AII, JON25BII, CG30090, CG11912                                                                                                                                                                                                                                                                                                                                                                                                                                                                                           | 210        | 229      | 10984     | 2.284050738     | 0.99999397 | 0.66466149 | 35.3950296 | N                                             |
| INTERPRO             | IPR001254:Peptidase S1                                  | 10    | 4.21940928 | 0.05698  | BETATRY, JON25BI, JON99CI, EPSILONTRY, THETATRY, CG1304, JON65AII, JON25BII, CG30090, CG11912                                                                                                                                                                                                                                                                                                                                                                                                                                                                                           | 210        | 257      | 10984     | 2.035204743     | 1          | 0.77466349 | 55.6254482 | N                                             |
| GOTERM_MF_DIRECT     | GO:004252--serine-type endopeptidase activity           | 10    | 4.21940928 | 0.058164 | BETATRY, JON25BI, JON99CI, EPSILONTRY, THETATRY, CG1304, JON65AII, JON25BII, CG30090, CG11912                                                                                                                                                                                                                                                                                                                                                                                                                                                                                           | 164        | 280      | 9284      | 2.021777003     | 0.99999614 | 0.58947065 | 53.04189   | N                                             |
| INTERPRO             | IPR009003:Trypsin-like cysteine/serine peptidase domain | 10    | 4.21940928 | 0.064306 | BETATRY, JON25BI, JON99CI, EPSILONTRY, THETATRY, CG1304, JON65AII, JON25BII, CG30090, CG11912                                                                                                                                                                                                                                                                                                                                                                                                                                                                                           | 210        | 263      | 10984     | 1.988774217     | 1          | 0.77454587 | 60.1686319 | N                                             |
| Annotation Cluster 6 | Enrichment Score: 2.06538775108392                      |       |            |          |                                                                                                                                                                                                                                                                                                                                                                                                                                                                                                                                                                                         |            |          |           |                 |            |            |            |                                               |
| Category             | Term                                                    | Count | %          | PValue   | Genes                                                                                                                                                                                                                                                                                                                                                                                                                                                                                                                                                                                   | List Total | Pop Hits | Pop Total | Fold Enrichment | Bonferroni | Benjamini  | FDR        | Included for comparison (Top 20 significance) |
| GOTERM_BP_DIRECT     | GO:0019731--antibacterial humoral response              | 5     | 2.10970464 | 4.92E-04 | IM3, CECC, DEF, MTK, ATTA                                                                                                                                                                                                                                                                                                                                                                                                                                                                                                                                                               | 182        | 23       | 10996     | 13.13425705     | 0.19952636 | 0.07149907 | 0.69653064 | Y                                             |
| UP_KEYWORDS          | Antimicrobial                                           | 5     | 2.10970464 | 6.35E-04 | CECC, DEF, MTK, LYSX, ATTA                                                                                                                                                                                                                                                                                                                                                                                                                                                                                                                                                              | 235        | 24       | 13921     | 12.34131206     | 0.08096375 | 0.01198894 | 0.7395214  | N                                             |
| UP_KEYWORDS          | Antibiotic                                              | 4     | 1.68776371 | 0.001488 | CECC, DEF, MTK, ATTA                                                                                                                                                                                                                                                                                                                                                                                                                                                                                                                                                                    | 235        | 14       | 13921     | 16.92522796     | 0.17968681 | 0.02445465 | 1.7262636  | N                                             |
| GOTERM_BP_DIRECT     | GO:0050830--defense response to Gram-positive bacterium | 6     | 2.53164557 | 0.002215 | CECC, DEF, MTK, LYSX, ATTA, DPTB                                                                                                                                                                                                                                                                                                                                                                                                                                                                                                                                                        | 182        | 56       | 10996     | 6.473312402     | 0.63295951 | 0.22164361 | 3.0988395  | Y                                             |
| UP_KEYWORDS          | Innate immunity                                         | 6     | 2.53164557 | 0.004681 | IM3, CECC, DEF, MTK, TOTC, ATTA                                                                                                                                                                                                                                                                                                                                                                                                                                                                                                                                                         | 235        | 65       | 13921     | 5.468150573     | 0.46425111 | 0.05515599 | 5.33892062 | N                                             |
| UP_KEYWORDS          | Immunity                                                | 6     | 2.53164557 | 0.006412 | IM3, CECC, DEF, MTK, TOTC, ATTA                                                                                                                                                                                                                                                                                                                                                                                                                                                                                                                                                         | 235        | 70       | 13921     | 5.077568389     | 0.57496457 | 0.06881617 | 7.24597797 | N                                             |
| GOTERM_BP_DIRECT     | GO:0009617--response to bacterium                       | 5     | 2.10970464 | 0.006762 | IM3, DEF, MTK, PHK-3, TOTC                                                                                                                                                                                                                                                                                                                                                                                                                                                                                                                                                              | 182        | 46       | 10996     | 6.567128524     | 0.95343843 | 0.40020257 | 9.18308139 | Y                                             |
| GOTERM_BP_DIRECT     | GO:0006959--humoral immune response                     | 4     | 1.68776371 | 0.006884 | CECC, DEF, ATTA, DPTB                                                                                                                                                                                                                                                                                                                                                                                                                                                                                                                                                                   | 182        | 24       | 10996     | 10.06959707     | 0.95594839 | 0.3598522  | 9.34099915 | Y                                             |
| GOTERM_BP_DIRECT     | GO:0045087--innate immune response                      | 7     | 2.9535865  | 0.007343 | IM3, CECC, DEF, MTK, RALA, TOTC, ATTA                                                                                                                                                                                                                                                                                                                                                                                                                                                                                                                                                   | 182        | 104      | 10996     | 4.066568047     | 0.96425389 | 0.34059293 | 9.93391667 | Y                                             |
| GOTERM_BP_DIRECT     | GO:0050829--defense response to Gram-negative bacterium | 6     | 2.53164557 | 0.03277  | CECC, MTK, TEP2, RALA, LYSX, ATTA                                                                                                                                                                                                                                                                                                                                                                                                                                                                                                                                                       | 182        | 108      | 10996     | 3.356532357     | 0.99999971 | 0.71492452 | 37.6863505 | N                                             |
| UP_SEQ_FEATURE       | sequence variant                                        | 7     | 2.9535865  | 0.093892 | CECC, CYP4D1, DEF, MTK, MLE, CLC-A, LYSX                                                                                                                                                                                                                                                                                                                                                                                                                                                                                                                                                | 45         | 225      | 3113      | 2.152197531     | 0.99999994 | 0.84125735 | 69.8944054 | N                                             |
| UP_KEYWORDS          | Polymorphism                                            | 5     | 2.10970464 | 0.143657 | CECC, CYP4D1, DEF, E(SPL)M3-HLH, MTK                                                                                                                                                                                                                                                                                                                                                                                                                                                                                                                                                    | 235        | 120      | 13921     | 2.468262411     | 1          | 0.50897023 | 83.6896722 | N                                             |
| GOTERM_BP_DIRECT     | GO:0042742--defense response to bacterium               | 3     | 1.26582278 | 0.302419 | CECC, DEF, ATTA                                                                                                                                                                                                                                                                                                                                                                                                                                                                                                                                                                         | 182        | 67       | 10996     | 2.705264884     | 1          | 0.99382304 | 99.3978886 | N                                             |
| Annotation Cluster 7 | Enrichment Score: 2.0516651961259957                    |       |            |          |                                                                                                                                                                                                                                                                                                                                                                                                                                                                                                                                                                                         |            |          |           |                 |            |            |            |                                               |
| Category             | Term                                                    | Count | %          | PValue   | Genes                                                                                                                                                                                                                                                                                                                                                                                                                                                                                                                                                                                   | List Total | Pop Hits | Pop Total | Fold Enrichment | Bonferroni | Benjamini  | FDR        | Included for comparison (Top 20 significance) |
| UP_KEYWORDS          | Membrane                                                | 74    | 31.2236287 | 0.003852 | HH, SDA, CG10344, CG30495, CG33080, LPR1, RALA, CG4991, CG12824, TSP42EI, CG10444, CYP4D1, UGT35B, CG33474, CLC-A, CG31522, WLS, CYP4P1, CYP28A5, CYP6A2, GAL, CYP4P2, DTG, ASTA-R2, CG5999, ADAMTS-A, CG43187, ORK1, CG31259, CG5361, IRK1, CG8195, L(2)K12914, CG16700, PPK12, CG5697, CG31475, SUGB, UGT37B1, UGT86DI, CG10936, CG10073, UGT86DG, MFS9, CG4607, CG17928, FZ, VHA100-4, MFS1, CG1698, IR76A, CG17752, CG6901, BMCP, CG43394, DH31-R, LRCH, MEW, P24-1, CG10062, MIPP1, OUT, CG8925, CG12950, CG1946, CG17664, FZ3, CG1139, SESN, MES2, CG3961, MTHL8, CG5070, CG31446 | 235        | 3266     | 13921     | 1.342202707     | 0.40149582 | 0.05003694 | 4.41258549 | N                                             |
| GOTERM_CC_DIRECT     | GO:0016021--integral component of membrane              | 62    | 26.1603376 | 0.010197 | SDA, CG10344, CG30495, CG33080, LPR1, CG4991, CG12824, TSP42EI, UGT35B, CLC-A, CG31522, GAL, DTG, ASTA-R2, CG5999, ADAMTS-A, CG43187, ORK1, CG31259, CG5361, IRK1, CG8195, L(2)K12914, CG16700, PPK12, CG5697, CG31475, SUGB, UGT37B1, UGT86DI, CG10936, UGT86DG, CG10073, MFS9, CG4607, CG17928, FZ, VHA100-4, MFS1, CG1698, IR76A, CG17752, CG6901, BMCP, DH31-R, CG43394, LRCH, P24-1, CG10062, OUT, CG8925, CG12950, CG1946, CG17664, CG1139, FZ3, SESN, MES2, CG3961, MTHL8, CG5070, CG31446                                                                                       | 168        | 2814     | 10026     | 1.314879683     | 0.60243928 | 0.20594448 | 10.5504996 | Y                                             |



| Category              | Term                                                                                                             | Count | %          | PValue   | Genes                                                                                                                                | List Total | Pop Hits | Pop Total | Fold Enrichment | Bonferroni | Benjamini  | FDR        | Included for comparison (Top 20 significance) |
|-----------------------|------------------------------------------------------------------------------------------------------------------|-------|------------|----------|--------------------------------------------------------------------------------------------------------------------------------------|------------|----------|-----------|-----------------|------------|------------|------------|-----------------------------------------------|
| UP_KEYWORDS           | Iron                                                                                                             | 9     | 3.79746835 | 0.01466  | RFESP, CYP4D1, RY, RNRS, AOX3, CYP6A2, CYP28A5, CYP4P1, CYP4P2                                                                       | 235        | 189      | 13921     | 2.820871327     | 0.85972524 | 0.11552366 | 15.8592957 | N                                             |
| GOTERM_MF_DIRECT      | GO:0016491-oxidoreductase activity                                                                               | 9     | 3.79746835 | 0.02034  | CG30495, CG9509, CG17928, RNRS, CYP6A2, CYP28A5, CG10672, CG3270, CG10863                                                            | 164        | 193      | 9284      | 2.639833186     | 0.98607822 | 0.41391331 | 22.8347146 | Y                                             |
| UP_SEQ_FEATURE        | binding site:Heme (covalent; via 1 link)                                                                         | 3     | 1.26582278 | 0.020665 | CYP4D1, CYP4P1, CYP4P2                                                                                                               | 45         | 16       | 3113      | 12.97083333     | 0.97004686 | 0.39417261 | 22.4497347 | N                                             |
| GOTERM_CC_DIRECT      | GO:0031090-organelle membrane                                                                                    | 5     | 2.10970464 | 0.042584 | CYP4D1, CYP6A2, CYP28A5, CYP4P1, CYP4P2                                                                                              | 168        | 79       | 10026     | 3.777124774     | 0.98008994 | 0.38710782 | 37.712556  | N                                             |
| UP_KEYWORDS           | Microsome                                                                                                        | 5     | 2.10970464 | 0.043979 | CYP4D1, CYP6A2, CYP28A5, CYP4P1, CYP4P2                                                                                              | 235        | 79       | 13921     | 3.749259359     | 0.99747538 | 0.27008305 | 40.8966217 | N                                             |
| UP_SEQ_FEATURE        | metal ion-binding site:Iron (heme axial ligand)                                                                  | 5     | 2.10970464 | 0.044987 | CYP4D1, CYP6A2, CYP28A5, CYP4P1, CYP4P2                                                                                              | 45         | 96       | 3113      | 3.603009259     | 0.9995619  | 0.61963843 | 42.9041027 | N                                             |
| GOTERM_MF_DIRECT      | GO:0005506-iron ion binding                                                                                      | 7     | 2.9535865  | 0.045967 | CYP4D1, RY, AOX3, CYP6A2, CYP28A5, CYP4P1, CYP4P2                                                                                    | 164        | 148      | 9284      | 2.677488464     | 0.99994387 | 0.589264   | 44.7662993 | N                                             |
| UP_KEYWORDS           | Oxidoreductase                                                                                                   | 17    | 7.17299578 | 0.046974 | CYP4D1, CG17544, CG9509, RNRS, CG17928, CYP28A5, CYP4P1, CYP6A2, CYP4P2, CG10672, CG14688, RFESP, CG30495, RY, AOX3, CG3270, CG10863 | 235        | 601      | 13921     | 1.67562573      | 0.99833681 | 0.27381536 | 43.0259345 | N                                             |
| INTERPRO              | IPR017972:Cytochrome P450, conserved site                                                                        | 5     | 2.10970464 | 0.065941 | CYP4D1, CYP6A2, CYP28A5, CYP4P1, CYP4P2                                                                                              | 210        | 80       | 10984     | 3.269047619     | 1          | 0.76399294 | 61.1216507 | N                                             |
| GOTERM_MF_DIRECT      | GO:0004497-monoxygenase activity                                                                                 | 5     | 2.10970464 | 0.068814 | CYP4D1, CYP6A2, CYP28A5, CYP4P1, CYP4P2                                                                                              | 164        | 88       | 9284      | 3.216463415     | 0.99999964 | 0.56126977 | 59.3171917 | N                                             |
| GOTERM_MF_DIRECT      | GO:0016705-oxidoreductase activity, acting on paired donors, with incorporation or reduction of molecular oxygen | 5     | 2.10970464 | 0.075827 | CYP4D1, CYP6A2, CYP28A5, CYP4P1, CYP4P2                                                                                              | 164        | 91       | 9284      | 3.110426159     | 0.99999992 | 0.57821514 | 63.0171841 | N                                             |
| COG_ONTOLOGY          | Secondary metabolites biosynthesis, transport, and catabolism                                                    | 5     | 2.10970464 | 0.082152 | CYP4D1, CYP6A2, CYP28A5, CYP4P1, CYP4P2                                                                                              | 24         | 91       | 1239      | 2.836538462     | 0.61052802 | 0.3759231  | 41.3753614 | N                                             |
| INTERPRO              | IPR001128:Cytochrome P450                                                                                        | 5     | 2.10970464 | 0.086738 | CYP4D1, CYP6A2, CYP28A5, CYP4P1, CYP4P2                                                                                              | 210        | 88       | 10984     | 2.971861472     | 1          | 0.83788045 | 71.5372547 | N                                             |
| UP_KEYWORDS           | Endoplasmic reticulum                                                                                            | 7     | 2.9535865  | 0.090816 | CYP4D1, CYP6A2, CYP28A5, WLS, CYP4P1, CYP4P2, L(2)K12914                                                                             | 235        | 184      | 13921     | 2.253630897     | 0.99999683 | 0.4099849  | 67.1506532 | N                                             |
| UP_KEYWORDS           | Monoxygenase                                                                                                     | 5     | 2.10970464 | 0.09555  | CYP4D1, CYP6A2, CYP28A5, CYP4P1, CYP4P2                                                                                              | 235        | 103      | 13921     | 2.875645528     | 0.99999842 | 0.41390801 | 69.0960509 | N                                             |
| UP_KEYWORDS           | Heme                                                                                                             | 5     | 2.10970464 | 0.131582 | CYP4D1, CYP6A2, CYP28A5, CYP4P1, CYP4P2                                                                                              | 235        | 116      | 13921     | 2.553374908     | 0.99999999 | 0.48836392 | 80.7882202 | N                                             |
| GOTERM_BP_DIRECT      | GO:0055114-oxidation-reduction process                                                                           | 11    | 4.64135021 | 0.142254 | CYP4D1, CG9509, RY, RNRS, AOX3, CYP6A2, CYP28A5, CYP4P1, CYP4P2, CG3270, CG10863                                                     | 182        | 412      | 10996     | 1.613090793     | 1          | 0.96321859 | 88.6769114 | N                                             |
| INTERPRO              | IPR002401:Cytochrome P450, E-class, group I                                                                      | 4     | 1.68776371 | 0.180675 | CYP4D1, CYP6A2, CYP4P1, CYP4P2                                                                                                       | 210        | 77       | 10984     | 2.717130489     | 1          | 0.95772184 | 93.6695816 | N                                             |
| GOTERM_MF_DIRECT      | GO:0020037-heme binding                                                                                          | 5     | 2.10970464 | 0.201944 | CYP4D1, CYP6A2, CYP28A5, CYP4P1, CYP4P2                                                                                              | 164        | 132      | 9284      | 2.144308943     | 1          | 0.8128247  | 94.1895748 | N                                             |
| GOTERM_CC_DIRECT      | GO:0005789-endoplasmic reticulum membrane                                                                        | 5     | 2.10970464 | 0.504664 | CYP4D1, CYP6A2, CYP28A5, CYP4P1, CYP4P2                                                                                              | 168        | 221      | 10026     | 1.350193924     | 1          | 0.99227736 | 99.9520389 | N                                             |
| Annotation Cluster 12 | Enrichment Score: 1.1207098573368486                                                                             |       |            |          |                                                                                                                                      |            |          |           |                 |            |            |            |                                               |
| Category              | Term                                                                                                             | Count | %          | PValue   | Genes                                                                                                                                | List Total | Pop Hits | Pop Total | Fold Enrichment | Bonferroni | Benjamini  | FDR        | Included for comparison (Top 20 significance) |
| GOTERM_MF_DIRECT      | GO:0016614-oxidoreductase activity, acting on CH-OH group of donors                                              | 3     | 1.26582278 | 0.056263 | CG9509, RY, AOX3                                                                                                                     | 164        | 22       | 9284      | 7.719512195     | 0.99999412 | 0.63349111 | 51.831838  | N                                             |
| GOTERM_MF_DIRECT      | GO:0009055-electron carrier activity                                                                             | 4     | 1.68776371 | 0.057173 | CG17544, RY, AOX3, CYP28A5                                                                                                           | 164        | 50       | 9284      | 4.528780488     | 0.99999519 | 0.61013616 | 52.4144593 | N                                             |
| UP_KEYWORDS           | FAD                                                                                                              | 4     | 1.68776371 | 0.079909 | CG17544, CG9509, RY, AOX3                                                                                                            | 235        | 60       | 13921     | 3.949219858     | 0.99998453 | 0.3822013  | 62.2358219 | N                                             |
| GOTERM_MF_DIRECT      | GO:0050660-flavin adenine dinucleotide binding                                                                   | 4     | 1.68776371 | 0.088149 | CG17544, CG9509, RY, AOX3                                                                                                            | 164        | 60       | 9284      | 3.77398374      | 1          | 0.59908188 | 68.777855  | N                                             |
| UP_KEYWORDS           | Flavoprotein                                                                                                     | 4     | 1.68776371 | 0.109957 | CG17544, CG9509, RY, AOX3                                                                                                            | 235        | 69       | 13921     | 3.434104224     | 0.99999981 | 0.44891723 | 74.3863425 | N                                             |
| Annotation Cluster 13 | Enrichment Score: 1.1200972165701493                                                                             |       |            |          |                                                                                                                                      |            |          |           |                 |            |            |            |                                               |
| Category              | Term                                                                                                             | Count | %          | PValue   | Genes                                                                                                                                | List Total | Pop Hits | Pop Total | Fold Enrichment | Bonferroni | Benjamini  | FDR        | Included for comparison (Top 20 significance) |
| INTERPRO              | IPR020846:Major facilitator superfamily domain                                                                   | 8     | 3.37552743 | 0.049797 | SUGB, MFS9, CG4607, OUT, CG8925, CG17752, CG6901, MFS1                                                                               | 210        | 175      | 10984     | 2.39107483      | 1          | 0.77620715 | 50.7084961 | N                                             |
| GOTERM_BP_DIRECT      | GO:0055085-transmembrane transport                                                                               | 10    | 4.21940928 | 0.050401 | CG10444, MFS9, CG4607, OUT, CG8925, CG17752, CG6901, BMCP, MFS1, CG17664                                                             | 182        | 290      | 10996     | 2.083364911     | 1          | 0.83438865 | 52.0087935 | N                                             |
| GOTERM_MF_DIRECT      | GO:0022857-transmembrane transporter activity                                                                    | 5     | 2.10970464 | 0.064335 | MFS9, CG17752, CG6901, BMCP, MFS1                                                                                                    | 164        | 86       | 9284      | 3.291264889     | 0.99999902 | 0.57872815 | 56.7787194 | N                                             |
| INTERPRO              | IPR011701:Major facilitator superfamily                                                                          | 4     | 1.68776371 | 0.204887 | MFS9, OUT, CG8925, MFS1                                                                                                              | 210        | 82       | 10984     | 2.5514518       | 1          | 0.96962392 | 95.8215929 | N                                             |
| Annotation Cluster 14 | Enrichment Score: 1.1179470584136082                                                                             |       |            |          |                                                                                                                                      |            |          |           |                 |            |            |            |                                               |
| Category              | Term                                                                                                             | Count | %          | PValue   | Genes                                                                                                                                | List Total | Pop Hits | Pop Total | Fold Enrichment | Bonferroni | Benjamini  | FDR        | Included for comparison (Top 20 significance) |
| INTERPRO              | IPR013057:Amino acid transporter, transmembrane                                                                  | 3     | 1.26582278 | 0.036291 | CG1139, CG4991, CG16700                                                                                                              | 210        | 16       | 10984     | 9.807142857     | 0.99999924 | 0.69076762 | 40.067289  | N                                             |
| GOTERM_BP_DIRECT      | GO:0003333-amino acid transmembrane transport                                                                    | 3     | 1.26582278 | 0.102137 | CG1139, CG4991, CG16700                                                                                                              | 182        | 33       | 10996     | 5.492507493     | 1          | 0.92292824 | 78.3342372 | N                                             |

|                       |                                                                                  |       |            |          |                                                                                                 |            |          |           |                 |            |            |            |                                               |
|-----------------------|----------------------------------------------------------------------------------|-------|------------|----------|-------------------------------------------------------------------------------------------------|------------|----------|-----------|-----------------|------------|------------|------------|-----------------------------------------------|
| GOTERM_MF_DIRECT      | GO:0015171--amino acid transmembrane transporter activity                        | 3     | 1.26582278 | 0.119448 | CG1139, CG4991, CG16700                                                                         | 164        | 34       | 9284      | 4.994978479     | 1          | 0.68348659 | 79.903773  | N                                             |
| Annotation Cluster 15 | Enrichment Score: 0.9737234206526821                                             |       |            |          |                                                                                                 |            |          |           |                 |            |            |            |                                               |
| Category              | Term                                                                             | Count | %          | PValue   | Genes                                                                                           | List Total | Pop Hits | Pop Total | Fold Enrichment | Bonferroni | Benjamini  | FDR        | Included for comparison (Top 20 significance) |
| SMART                 | SM00516:SEC14                                                                    | 3     | 1.26582278 | 0.080214 | CG32407, CG3091, CG5973                                                                         | 86         | 29       | 5218      | 6.276663994     | 0.99776565 | 0.78258591 | 58.220111  | N                                             |
| INTERPRO              | IPR011074:CRAL/TRIO, N-terminal domain                                           | 3     | 1.26582278 | 0.104712 | CG32407, CG3091, CG5973                                                                         | 210        | 29       | 10984     | 5.410837438     | 1          | 0.86557898 | 78.3867405 | N                                             |
| INTERPRO              | IPR001251:CRAL-TRIO domain                                                       | 3     | 1.26582278 | 0.142753 | CG32407, CG3091, CG5973                                                                         | 210        | 35       | 10984     | 4.483265306     | 1          | 0.92203753 | 88.1541102 | N                                             |
| Annotation Cluster 16 | Enrichment Score: 0.591296993313303                                              |       |            |          |                                                                                                 |            |          |           |                 |            |            |            |                                               |
| Category              | Term                                                                             | Count | %          | PValue   | Genes                                                                                           | List Total | Pop Hits | Pop Total | Fold Enrichment | Bonferroni | Benjamini  | FDR        | Included for comparison (Top 20 significance) |
| GOTERM_MF_DIRECT      | GO:0017147--Wnt-protein binding                                                  | 4     | 1.68776371 | 0.002515 | FZ3, SWIM, FZ, WLS                                                                              | 164        | 16       | 9284      | 14.15243902     | 0.40771687 | 0.12273189 | 3.12655417 | Y                                             |
| UP_KEYWORDS           | G-protein coupled receptor                                                       | 5     | 2.10970464 | 0.071557 | FZ3, FZ, MTHL8, ASTA-R2, DH31-R                                                                 | 235        | 93       | 13921     | 3.184854724     | 0.99994854 | 0.36163842 | 58.0269133 | N                                             |
| INTERPRO              | IPR017981:GPCR, family 2-like                                                    | 3     | 1.26582278 | 0.09868  | FZ3, FZ, DH31-R                                                                                 | 210        | 28       | 10984     | 5.604081633     | 1          | 0.86181903 | 76.280233  | N                                             |
| GOTERM_BP_DIRECT      | GO:0016055--Wnt signaling pathway                                                | 4     | 1.68776371 | 0.118823 | FZ3, FZ, PCL, WLS                                                                               | 182        | 73       | 10996     | 3.310552461     | 1          | 0.94266449 | 83.3996741 | N                                             |
| UP_KEYWORDS           | Wnt signaling pathway                                                            | 3     | 1.26582278 | 0.156839 | FZ3, FZ, WLS                                                                                    | 235        | 42       | 13921     | 4.231306991     | 1          | 0.50788573 | 86.3953047 | N                                             |
| GOTERM_MF_DIRECT      | GO:0004930--G-protein coupled receptor activity                                  | 4     | 1.68776371 | 0.16997  | FZ3, FZ, MTHL8, ASTA-R2                                                                         | 164        | 81       | 9284      | 2.795543511     | 1          | 0.78774373 | 90.4629385 | N                                             |
| GOTERM_BP_DIRECT      | GO:0007186--G-protein coupled receptor signaling pathway                         | 5     | 2.10970464 | 0.209666 | FZ3, FZ, MTHL8, ASTA-R2, DH31-R                                                                 | 182        | 143      | 10996     | 2.112502882     | 1          | 0.98053413 | 96.4573873 | N                                             |
| GOTERM_CC_DIRECT      | GO:0005886--plasma membrane                                                      | 15    | 6.32911392 | 0.437459 | MOD(MDG4), HH, AKAP200, SDA, MFS9, FZ, MIPP1, WLS, MFS1, CG1139, ORK1, MTHL8, RALA, PROS, HEXO2 | 168        | 786      | 10026     | 1.138904035     | 1          | 0.9909675  | 99.8085778 | N                                             |
| UP_KEYWORDS           | Cell membrane                                                                    | 8     | 3.37552743 | 0.476645 | CG1139, HH, MEW, FZ, MIPP1, MTHL8, RALA, WLS                                                    | 235        | 391      | 13921     | 1.212036785     | 1          | 0.85246784 | 99.9484836 | N                                             |
| UP_SEQ_FEATURE        | topological domain:Cytoplasmic                                                   | 7     | 2.9535865  | 0.497739 | FZ3, ORK1, MEW, FZ, CLC-A, MTHL8, WLS                                                           | 45         | 397      | 3113      | 1.219759306     | 1          | 0.9995529  | 99.9771611 | N                                             |
| UP_KEYWORDS           | Transducer                                                                       | 5     | 2.10970464 | 0.529094 | FZ3, FZ, MTHL8, ASTA-R2, DH31-R                                                                 | 235        | 226      | 13921     | 1.310581811     | 1          | 0.88129348 | 99.9850137 | N                                             |
| UP_KEYWORDS           | Receptor                                                                         | 8     | 3.37552743 | 0.609859 | FZ3, MEW, LPR1, IR76A, FZ, MTHL8, ASTA-R2, DH31-R                                               | 235        | 439      | 13921     | 1.079513401     | 1          | 0.92229323 | 99.9983395 | N                                             |
| UP_SEQ_FEATURE        | topological domain:Extracellular                                                 | 5     | 2.10970464 | 0.656947 | FZ3, MEW, FZ, MTHL8, WLS                                                                        | 45         | 312      | 3113      | 1.108618234     | 1          | 0.99998678 | 99.9997798 | N                                             |
| UP_SEQ_FEATURE        | transmembrane region                                                             | 8     | 3.37552743 | 0.713023 | FZ3, ORK1, MEW, FZ, CLC-A, MTHL8, WLS, L(2)K12914                                               | 45         | 566      | 3113      | 0.977777778     | 1          | 0.99999129 | 99.9999749 | N                                             |
| UP_SEQ_FEATURE        | glycosylation site:N-linked (GlcNAc...)                                          | 6     | 2.53164557 | 0.733423 | FZ3, ORK1, MEW, FZ, MTHL8, WLS                                                                  | 45         | 423      | 3113      | 0.981245075     | 1          | 0.99999162 | 99.9999898 | N                                             |
| UP_KEYWORDS           | Glycoprotein                                                                     | 8     | 3.37552743 | 0.746109 | CG1139, FZ3, ORK1, MEW, FZ, MIPP1, MTHL8, WLS                                                   | 235        | 503      | 13921     | 0.942159807     | 1          | 0.96998974 | 99.9999891 | N                                             |
| GOTERM_BP_DIRECT      | GO:0007476--imaginal disc-derived wing morphogenesis                             | 3     | 1.26582278 | 0.876193 | MEW, FZ, WLS                                                                                    | 182        | 217      | 10996     | 0.835266116     | 1          | 1          | 100        | N                                             |
| Annotation Cluster 17 | Enrichment Score: 0.39890087452955725                                            |       |            |          |                                                                                                 |            |          |           |                 |            |            |            |                                               |
| Category              | Term                                                                             | Count | %          | PValue   | Genes                                                                                           | List Total | Pop Hits | Pop Total | Fold Enrichment | Bonferroni | Benjamini  | FDR        | Included for comparison (Top 20 significance) |
| GOTERM_MF_DIRECT      | GO:0003700--transcription factor activity, sequence-specific DNA binding         | 9     | 3.79746835 | 0.110985 | LAB, XBP1, FOXK, E(SPL)M3-HLH, PDM2, PCL, REPTOR-BP, PROS, PTX1                                 | 164        | 275      | 9284      | 1.852682927     | 1          | 0.6711809  | 77.3266801 | N                                             |
| UP_SEQ_FEATURE        | mutagenesis site                                                                 | 6     | 2.53164557 | 0.157916 | MOD(MDG4), HH, ESG, PCL, DRM, WLS                                                               | 45         | 204      | 3113      | 2.034640523     | 1          | 0.94428505 | 87.6641581 | N                                             |
| UP_SEQ_FEATURE        | DNA-binding region:Homeobox                                                      | 3     | 1.26582278 | 0.16151  | LAB, PDM2, PTX1                                                                                 | 45         | 51       | 3113      | 4.069281046     | 1          | 0.932141   | 88.2900604 | N                                             |
| GOTERM_BP_DIRECT      | GO:0006351--transcription, DNA-templated                                         | 10    | 4.21940928 | 0.167726 | MOD(MDG4), LAB, ESG, E(SPL)M3-HLH, PDM2, PCL, MEF2, DRM, PROS, PTX1                             | 182        | 376      | 10996     | 1.606850596     | 1          | 0.97289439 | 92.619197  | N                                             |
| GOTERM_MF_DIRECT      | GO:0043565--sequence-specific DNA binding                                        | 8     | 3.37552743 | 0.17995  | LAB, FOXK, TRAX, E(SPL)M3-HLH, PDM2, CTCF, REPTOR-BP, PTX1                                      | 164        | 263      | 9284      | 1.721969767     | 1          | 0.79548696 | 91.8126696 | N                                             |
| UP_KEYWORDS           | Developmental protein                                                            | 14    | 5.907173   | 0.199676 | LAB, HH, PDM2, E(SPL)M3-HLH, ESG, FZ, MIPP1, PCL, WLS, DRM, FZ3, MEF2, PROS, PTX1               | 235        | 593      | 13921     | 1.398543289     | 1          | 0.58159296 | 92.6054923 | N                                             |
| UP_KEYWORDS           | Homeobox                                                                         | 4     | 1.68776371 | 0.254689 | LAB, PDM2, PROS, PTX1                                                                           | 235        | 104      | 13921     | 2.278396072     | 1          | 0.67274752 | 96.7843297 | N                                             |
| UP_KEYWORDS           | Transcription regulation                                                         | 10    | 4.21940928 | 0.266878 | MOD(MDG4), LAB, ESG, E(SPL)M3-HLH, PDM2, PCL, MEF2, DRM, PROS, PTX1                             | 235        | 416      | 13921     | 1.423997545     | 1          | 0.68238414 | 97.348214  | N                                             |
| GOTERM_BP_DIRECT      | GO:0045892--negative regulation of transcription, DNA-templated                  | 4     | 1.68776371 | 0.316502 | ESG, PCL, CTCF, DRM                                                                             | 182        | 120      | 10996     | 2.013919414     | 1          | 0.99364701 | 99.5492482 | N                                             |
| GOTERM_BP_DIRECT      | GO:0045944--positive regulation of transcription from RNA polymerase II promoter | 6     | 2.53164557 | 0.321769 | LAB, ESG, MLE, MEF2, DRM, PROS                                                                  | 182        | 228      | 10996     | 1.589936379     | 1          | 0.99335706 | 99.5961297 | N                                             |
| UP_KEYWORDS           | Activator                                                                        | 4     | 1.68776371 | 0.323375 | ESG, PDM2, MEF2, PTX1                                                                           | 235        | 119      | 13921     | 1.99120329      | 1          | 0.72715986 | 98.9617543 | N                                             |

|                       |                                                                                  |       |            |          |                                                                                                                                                          |            |          |           |                 |            |            |            |                                               |
|-----------------------|----------------------------------------------------------------------------------|-------|------------|----------|----------------------------------------------------------------------------------------------------------------------------------------------------------|------------|----------|-----------|-----------------|------------|------------|------------|-----------------------------------------------|
| UP_KEYWORDS           | Transcription                                                                    | 10    | 4.21940928 | 0.325396 | MOD(MDG4), LAB, ESG, E(SPL)M3-HLH, PDM2, PCL, MEF2, DRM, PROS, PTX1                                                                                      | 235        | 442      | 13921     | 1.340232984     | 1          | 0.7210978  | 98.9974449 | N                                             |
| SMART                 | SM00389:HOX                                                                      | 3     | 1.26582278 | 0.498463 | LAB, PDM2, PTX1                                                                                                                                          | 86         | 102      | 5218      | 1.784541724     | 1          | 0.99977422 | 99.9255639 | N                                             |
| INTERPRO              | IPR017970:Homeobox, conserved site                                               | 3     | 1.26582278 | 0.525425 | LAB, PDM2, PTX1                                                                                                                                          | 210        | 92       | 10984     | 1.705590062     | 1          | 0.99997294 | 99.996711  | N                                             |
| INTERPRO              | IPR009057:Homeodomain-like                                                       | 4     | 1.68776371 | 0.542099 | LAB, PDM2, PROS, PTX1                                                                                                                                    | 210        | 149      | 10984     | 1.404154682     | 1          | 0.99997579 | 99.9979958 | N                                             |
| INTERPRO              | IPR001356:Homeodomain                                                            | 3     | 1.26582278 | 0.581469 | LAB, PDM2, PTX1                                                                                                                                          | 210        | 102      | 10984     | 1.53837535      | 1          | 0.99998928 | 99.9994229 | N                                             |
| GOTERM_BP_DIRECT      | GO:0006355--regulation of transcription, DNA-templated                           | 7     | 2.9535865  | 0.651525 | LAB, CG1894, FOXK, E(SPL)M3-HLH, PDM2, PROS, PTX1                                                                                                        | 182        | 401      | 10996     | 1.054671015     | 1          | 0.99999329 | 99.9999683 | N                                             |
| UP_KEYWORDS           | DNA-binding                                                                      | 9     | 3.79746835 | 0.681835 | LAB, FOXK, ESG, E(SPL)M3-HLH, PDM2, MEF2, DRM, PROS, PTX1                                                                                                | 235        | 535      | 13921     | 0.996532114     | 1          | 0.94953439 | 99.999847  | N                                             |
| GOTERM_BP_DIRECT      | GO:0001122--negative regulation of transcription from RNA polymerase II promoter | 3     | 1.26582278 | 0.707461 | ESG, DRM, PROS                                                                                                                                           | 182        | 149      | 10996     | 1.216461391     | 1          | 0.9999982  | 99.9999974 | N                                             |
| GOTERM_MF_DIRECT      | GO:0003677--DNA binding                                                          | 7     | 2.9535865  | 0.930443 | MOD(MDG4), ESG, PDM2, PCL, MEF2, DRM, PROS                                                                                                               | 164        | 555      | 9284      | 0.713996924     | 1          | 0.99999954 | 100        | N                                             |
| UP_KEYWORDS           | Nucleus                                                                          | 14    | 5.907173   | 0.949719 | MOD(MDG4), HH, LAB, SESN, CG1894, ESG, E(SPL)M3-HLH, PDM2, MLE, PCL, MEF2, DRM, PROS, PTX1                                                               | 235        | 1134     | 13921     | 0.731337011     | 1          | 0.99906686 | 100        | N                                             |
| UP_KEYWORDS           | Zinc-finger                                                                      | 4     | 1.68776371 | 0.958705 | MOD(MDG4), ESG, PCL, DRM                                                                                                                                 | 235        | 384      | 13921     | 0.617065603     | 1          | 0.99932993 | 100        | N                                             |
| GOTERM_CC_DIRECT      | GO:0005634--nucleus                                                              | 22    | 9.28270042 | 0.982125 | MOD(MDG4), HH, LAB, PDM2, CG12493, E(SPL)M3-HLH, ESG, MLE, PCL, CTCF, DRM, MES2, SESN, CG1894, XBP1, FUSS, MEF2, CG32104, REPTOR-BP, PROS, PTX1, CG12119 | 168        | 1832     | 10026     | 0.716664067     | 1          | 1          | 100        | N                                             |
| UP_KEYWORDS           | Phosphoprotein                                                                   | 8     | 3.37552743 | 0.995064 | MOD(MDG4), ORK1, SESN, PDM2, RNRS, PCL, MEF2, PROS                                                                                                       | 235        | 909      | 13921     | 0.521349156     | 1          | 0.99999065 | 100        | N                                             |
| Annotation Cluster 18 | Enrichment Score: 0.39229739210790504                                            |       |            |          |                                                                                                                                                          |            |          |           |                 |            |            |            |                                               |
| Category              | Term                                                                             | Count | %          | PValue   | Genes                                                                                                                                                    | List Total | Pop Hits | Pop Total | Fold Enrichment | Bonferroni | Benjamini  | FDR        | Included for comparison (Top 20 significance) |
| GOTERM_BP_DIRECT      | GO:0007264--small GTPase mediated signal transduction                            | 4     | 1.68776371 | 0.101429 | DND, CG5160, RALA, CG7787                                                                                                                                | 182        | 68       | 10996     | 3.553975436     | 1          | 0.9318215  | 78.0905794 | N                                             |
| UP_KEYWORDS           | GTP-binding                                                                      | 4     | 1.68776371 | 0.291165 | DND, CG5160, RALA, BETATUB60D                                                                                                                            | 235        | 112      | 13921     | 2.115653495     | 1          | 0.70975158 | 98.211639  | N                                             |
| GOTERM_MF_DIRECT      | GO:0005525--GTP binding                                                          | 5     | 2.10970464 | 0.373764 | DND, CG10924, CG5160, RALA, BETATUB60D                                                                                                                   | 164        | 176      | 9284      | 1.608231707     | 1          | 0.95673093 | 99.7271237 | N                                             |
| UP_KEYWORDS           | Nucleotide-binding                                                               | 6     | 2.53164557 | 0.992686 | DND, TAKL2, MLE, CG5160, RALA, BETATUB60D                                                                                                                | 235        | 701      | 13921     | 0.507032507     | 1          | 0.99998157 | 100        | N                                             |
| INTERPRO              | IPR027417:P-loop containing nucleoside triphosphate hydrolase                    | 4     | 1.68776371 | 0.997244 | DND, MLE, CG5160, RALA                                                                                                                                   | 210        | 512      | 10984     | 0.408630952     | 1          | 1          | 100        | N                                             |
| Annotation Cluster 19 | Enrichment Score: 0.3211910835193623                                             |       |            |          |                                                                                                                                                          |            |          |           |                 |            |            |            |                                               |
| Category              | Term                                                                             | Count | %          | PValue   | Genes                                                                                                                                                    | List Total | Pop Hits | Pop Total | Fold Enrichment | Bonferroni | Benjamini  | FDR        | Included for comparison (Top 20 significance) |
| UP_SEQ_FEATURE        | splice variant                                                                   | 12    | 5.06329114 | 0.230659 | MOD(MDG4), HH, LAB, SESN, MEW, CYP4D1, FZ, MLE, CLC-A, MEF2, WLS, PROS                                                                                   | 45         | 610      | 3113      | 1.360874317     | 1          | 0.97455148 | 95.8937629 | N                                             |
| UP_KEYWORDS           | Alternative splicing                                                             | 12    | 5.06329114 | 0.496433 | MOD(MDG4), HH, LAB, SESN, MEW, CYP4D1, PDM2, MLE, CLC-A, MEF2, WLS, PROS                                                                                 | 235        | 631      | 13921     | 1.12656034      | 1          | 0.86241973 | 99.967174  | N                                             |
| UP_KEYWORDS           | Nucleus                                                                          | 14    | 5.907173   | 0.949719 | MOD(MDG4), HH, LAB, SESN, CG1894, ESG, E(SPL)M3-HLH, PDM2, MLE, PCL, MEF2, DRM, PROS, PTX1                                                               | 235        | 1134     | 13921     | 0.731337011     | 1          | 0.99906686 | 100        | N                                             |
| Annotation Cluster 20 | Enrichment Score: 0.1008313109778247                                             |       |            |          |                                                                                                                                                          |            |          |           |                 |            |            |            |                                               |
| Category              | Term                                                                             | Count | %          | PValue   | Genes                                                                                                                                                    | List Total | Pop Hits | Pop Total | Fold Enrichment | Bonferroni | Benjamini  | FDR        | Included for comparison (Top 20 significance) |
| GOTERM_BP_DIRECT      | GO:0045892--negative regulation of transcription, DNA-templated                  | 4     | 1.68776371 | 0.316502 | ESG, PCL, CTCF, DRM                                                                                                                                      | 182        | 120      | 10996     | 2.013919414     | 1          | 0.99364701 | 99.5492482 | N                                             |
| INTERPRO              | IPR013087:Zinc finger C2H2-type/integrase DNA-binding domain                     | 3     | 1.26582278 | 0.930798 | ESG, CTCF, DRM                                                                                                                                           | 210        | 225      | 10984     | 0.697396825     | 1          | 1          | 100        | N                                             |
| SMART                 | SM00355:ZnF_C2H2                                                                 | 3     | 1.26582278 | 0.940649 | ESG, CTCF, DRM                                                                                                                                           | 86         | 271      | 5218      | 0.671672531     | 1          | 1          | 100        | N                                             |
| GOTERM_MF_DIRECT      | GO:0046872--metal ion binding                                                    | 8     | 3.37552743 | 0.948073 | MOD(MDG4), RFESP, CG6839, HH, ESG, RNRS, CTCF, DRM                                                                                                       | 164        | 656      | 9284      | 0.690362879     | 1          | 0.99999986 | 100        | N                                             |
| INTERPRO              | IPR015880:Zinc finger, C2H2-like                                                 | 3     | 1.26582278 | 0.967186 | ESG, CTCF, DRM                                                                                                                                           | 210        | 271      | 10984     | 0.579019504     | 1          | 1          | 100        | N                                             |
| INTERPRO              | IPR007087:Zinc finger, C2H2                                                      | 3     | 1.26582278 | 0.97724  | ESG, CTCF, DRM                                                                                                                                           | 210        | 293      | 10984     | 0.535543637     | 1          | 1          | 100        | N                                             |
