# Supplementary material for: Predicted Drosophila Interactome Resource and web tool for functional interpretation of differentially expressed genes
Source: Oxford University Press journal article supplement (doi:10.1093/database/baaa005), 2020-01-01
Supplement: supplementary_table_s7_baaa005.pdf [file supplementary_table_s7_baaa005.pdf]

**Supplementary Table s7. Annotations produced by PDIR/GSLA for the observed CGS between the Apc1 mutant and wild type.**

Job Number: GSLA08055007085343

Cutoff used:

Q1: density >= 0.01

Q2: p <= 0

Meaning:

Q1: inter-geneset interaction density is greater than expected.

Q2: the observed interaction density can only be observed in the biologically correct interactome topology.

Categories selected: GO Panther pathway Reactome pathway

Species: Drosophila melanogaster

Interaction dataset selected: PDIR

#Quaried GeneSet: CG18404, CG6295, Drsl2, CG17191, CG17192, CG44014, MFS1, CG2772, CG5107, Mef2, CG3961, 18SrRNA-Psi:CR41602, CG8012, CG9682, CG8661, CG30090, CG12950, Muc18B, CG1304, CG1946, ppk12, CG11893, CG14528, CG6296, CTCF, p24-2///Unc-115a///Unc-115b, RFeSP, CG9394, DptB, Trax, CG4830, epsilonTry, Rbm13, CG32284, CG6271, pdm2, Peritrophin-15a, CG1139, CG12374, CG30480, CG5973, CHKov1, fuss, Rala, Ubqn, CG6839, CG5731, CG8768, Hsp60B///Ncc69, Ugt37b1, CG6908, CG6337, Cyp28a5, sda, betaTry, CG30345///CG9766, CG5070, Ir76a, CG10073, CG13658, CG17109, CG32483, Vha100-4, CG8560, CG3734, Jon25Bi, CG10062, CG18853///phr, l(3)72Dp, CG9259, CG18417, CG1894, CG34236, Hexo2, CG33346///Sid, REPTOR-BP, CG12934, CG6283, lab, LysX, CG4594, Cyp4p2, pncr009:3L, CG4607, Cyp4d1, betaTub60D, AttA, Btnd, CG11885, CG34386, CG6738, CIC-a, Jheh1, Mtk, pcl, CG5084, CG34005, Cyp6a2, Irk1, Ptx1, dnd, CG10344, CG30148, Bmcp, mle, wls, fz3, GstD5, CG9896, fz, CG10936, CG11912, CG14495, CG31469, CG4835, CG5770, AttB///AttA, AstA-R2, caix, p24-1, CG7787, CG5999, hh, Ugt35b, CG14688, CG33474, CG8353, CG43187, Def, Ork1, CG3270, CG8539, Bace, Ugt86Dg, CG42807, LpR1, TotC, Cyp4p1, CG33080, CG10514, thetaTry, Dtg, CG5767, CG9701, Dh31-R, CG10672, CG10924, CG1698, Jon25Bii, mthl8, CG13067, CG12824, CHKov1, CG10444, CG10863, CG3940, CG5160, CG31091, CG31475, CG15170, Jon99Ci, CG5361, TpnC25D, CG11671, CG6180, CG9509, Irk1, Phk-3, CG11892, CG43774///CG43773, Gal, mew, Swim, out, CG15818, CG31041, l(2)k12914, FoxK, AOX3, CG43783///orb2, Akap200, Ugt86Di, drm, GstE9, Tep2, smp-30, CG17928, IM3, CG4991, ry, Lrch, AdamTS-A, Mes2, Sugb, CG30495, mod(mdg4), CG8562, CG43394, CTCF, CG13360, CG31522, lcs///sesB, esg, Xbp1, Jon65Aii, CG13033, CG16700, CG12493, CG17544, CG32850, CG17664, Pvfl, CG33510, CG33722///CG18749, CCHa1, CG32407, CG6901, obst-H, mew, miple2, Sesn, antr, CG17826, CG8195, Takl2, CG8925, CG31446, RnrS, Tsp42Ei, MFS9, CG43120, CG31259, CG7194, hdly, Ect3, CG11470, CG9945, E(spl)m3-HLH, Mipp1, CG12970, CG12119, CG3091, Gfat1, CG32104, CG34112, pros, CG5697, CG17752, CecC, CG14696

#Subjob Number: GSLA08055007085343\_0

#Description: #fly\_TOP250

| Term type             | Term       | Description                | Term size | P value | Density | Interaction number | Overlap gene number | Overlap gene(s) | Interactions                                                                                                                                                                                                                                                                                                                                                                                                                                                                                                                                                                                                                                                                                                                                          |
|-----------------------|------------|----------------------------|-----------|---------|---------|--------------------|---------------------|-----------------|-------------------------------------------------------------------------------------------------------------------------------------------------------------------------------------------------------------------------------------------------------------------------------------------------------------------------------------------------------------------------------------------------------------------------------------------------------------------------------------------------------------------------------------------------------------------------------------------------------------------------------------------------------------------------------------------------------------------------------------------------------|
| GO biological process | GO:0007464 | R3/R4 cell fate commitment | 12        | 0       | 0.0163  | 45                 | 2                   | fz Rala         | pros-FBgn0003651 pros-FBgn0003118 pros-FBgn0000097 pros-FBgn0259211 pros-FBgn0263289 fz-FBgn0261617 fz-FBgn0003118 fz-FBgn0001297 fz-FBgn0000097 fz-FBgn0283521 fz-Rala fz-FBgn0001291 fz-FBgn0034049 fz-FBgn0263289 Rala-FBgn0261617 Rala-FBgn0003118 Rala-FBgn0000097 Rala-FBgn0283521 Rala-fz Rala-FBgn0001291 Rala-FBgn0034049 Rala-FBgn0263289 lab-FBgn0261617 mew-FBgn0263289 CTCF-FBgn0261617 CTCF-FBgn0001291 hh-FBgn0003118 hh-FBgn0001297 hh-fz hh-FBgn0263289 CG1894-FBgn0261617 Akap200-FBgn0263289 REPTOR-BP-FBgn0261617 REPTOR-BP-FBgn0001291 mle-FBgn0261617 mle-FBgn0000097 mle-FBgn0283521 pdm2-FBgn0261617 pdm2-FBgn0003651 Xbp1-FBgn0001291 mod(mdg4)-FBgn0003651 mod(mdg4)-FBgn0283521 Mipp1-fz CIC-a-FBgn0263289 Pcl-FBgn0261617 |

|                       |               |                                          |    |   |         |    |   |      |                                                                                                                                                                                                                                                                                                                                                                                                                                                                                                                                                                                                                                                                                                                                                                                                                                                                                                                                                                                                                                                                                                                                                                                                                                                                  |
|-----------------------|---------------|------------------------------------------|----|---|---------|----|---|------|------------------------------------------------------------------------------------------------------------------------------------------------------------------------------------------------------------------------------------------------------------------------------------------------------------------------------------------------------------------------------------------------------------------------------------------------------------------------------------------------------------------------------------------------------------------------------------------------------------------------------------------------------------------------------------------------------------------------------------------------------------------------------------------------------------------------------------------------------------------------------------------------------------------------------------------------------------------------------------------------------------------------------------------------------------------------------------------------------------------------------------------------------------------------------------------------------------------------------------------------------------------|
| Reactome pathway      | R-DME-2129379 | Molecules associated with elastic fibres | 9  | 0 | 0.01062 | 22 | 0 |      | pros-FBgn0004657 pros-FBgn0001250 fz-FBgn0004657 fz-FBgn0001250 fuss-FBgn0039914 lab-FBgn000490 mew-FBgn0010395 mew-FBgn0004657 mew-FBgn0001250 Pvf1-FBgn0039914 Pvf1-FBgn000490 Pvf1-FBgn0031461 Pvf1-FBgn0005590 hh-FBgn000490 hh-FBgn0004657 hh-FBgn0005590 CIC-a-FBgn0004657 CIC-a-FBgn0001250 Tep2-FBgn0039914 Tep2-FBgn000490 Tep2-FBgn0031461 Tep2-FBgn0005590                                                                                                                                                                                                                                                                                                                                                                                                                                                                                                                                                                                                                                                                                                                                                                                                                                                                                            |
| GO biological process | GO:0005109    | frizzled binding                         | 6  | 0 | 0.01086 | 15 | 0 |      | wls-FBgn0284084 pros-FBgn0284084 fz-FBgn0010453 fz-FBgn0015838 fz-FBgn0037671 fz-FBgn0284084 Rala-FBgn0015838 fz3-FBgn0284084 hh-FBgn0284084 hh-FBgn0038134 Vha100-4-FBgn0037671 mlh1-FBgn0004360 CG9394-FBgn0004360 esg-FBgn0284084 pdm2-FBgn0284084                                                                                                                                                                                                                                                                                                                                                                                                                                                                                                                                                                                                                                                                                                                                                                                                                                                                                                                                                                                                            |
| GO biological process | GO:0042659    | regulation of cell fate specification    | 28 | 0 | 0.01149 | 74 | 1 | pros | wls-FBgn0284084 pros-FBgn0261963 pros-FBgn0003870 pros-FBgn0262866 pros-FBgn0000097 pros-FBgn0004837 pros-FBgn0003118 pros-FBgn0003963 pros-FBgn0261648 pros-FBgn0259176 pros-FBgn0005561 pros-FBgn0284084 pros-FBgn0001235 pros-FBgn0000320 pros-FBgn0000547 pros-FBgn0000492 pros-FBgn0015371 fz-FBgn0000097 fz-FBgn0004837 fz-FBgn0003118 fz-FBgn0284084 fz-FBgn0000547 fz-FBgn0028387 Rala-FBgn0000097 Rala-FBgn0028582 Rala-FBgn0003118 lab-FBgn0000015 lab-FBgn0000606 lab-FBgn0003944 lab-FBgn0005561 lab-FBgn0001235 lab-FBgn0011278 lab-FBgn0000611 lab-FBgn0000492 mew-pros CTCF-FBgn0000606 E(spl)m3-HLH-FBgn0259176 E(spl)m3-HLH-pros fz3-FBgn0284084 hh-FBgn0261963 hh-FBgn0000015 hh-FBgn0003118 hh-FBgn0000606 hh-FBgn0003963 hh-FBgn0284084 hh-FBgn0001235 hh-FBgn0000320 hh-FBgn0000547 hh-FBgn0000492 CG1894-FBgn0028387 antr-FBgn0000015 TpnC25D-FBgn0004647 Akap200-FBgn0262866 esg-FBgn0262866 esg-FBgn0003963 esg-pros esg-FBgn0284084 mle-FBgn0003870 mle-FBgn0000097 pdm2-FBgn0261963 pdm2-FBgn0000015 pdm2-FBgn0000606 pdm2-FBgn0003944 pdm2-FBgn0005561 pdm2-FBgn0284084 pdm2-FBgn0008651 pdm2-FBgn0011278 pdm2-FBgn0000611 pdm2-FBgn0000492 mod(mdg4)-FBgn0003870 mod(mdg4)-FBgn0003944 CIC-a-pros CG1304-FBgn0004647 Pcl-FBgn0000015 |

|                       |            |                               |    |   |         |    |   |      |                                                                                                                                                                                                                                                                                                                                                                                                                                                                                                                                                                                                                                                                                                                                                                                                                                                                                                                                                                                                                                                                                                                                                                                                                                                                                                  |
|-----------------------|------------|-------------------------------|----|---|---------|----|---|------|--------------------------------------------------------------------------------------------------------------------------------------------------------------------------------------------------------------------------------------------------------------------------------------------------------------------------------------------------------------------------------------------------------------------------------------------------------------------------------------------------------------------------------------------------------------------------------------------------------------------------------------------------------------------------------------------------------------------------------------------------------------------------------------------------------------------------------------------------------------------------------------------------------------------------------------------------------------------------------------------------------------------------------------------------------------------------------------------------------------------------------------------------------------------------------------------------------------------------------------------------------------------------------------------------|
| GO biological process | GO:0048867 | stem cell fate determination  | 31 | 0 | 0.01009 | 72 | 1 | pros | <p>pros-FBgn0261963 pros-FBgn0004878 pros-FBgn0003300 pros-FBgn0000014 pros-FBgn0016977 pros-FBgn0085424 pros-FBgn0000577 pros-FBgn0003520 pros-FBgn0002973 pros-FBgn0010300 pros-FBgn0021776 pros-FBgn0259211 pros-FBgn0000492 pros-FBgn0267821 pros-FBgn0261930 fz-FBgn0040080 fz-FBgn0003520 fz-FBgn0259984 fz-FBgn0002973 lab-FBgn0025776 lab-FBgn0000014 lab-FBgn0085424 lab-FBgn0000577 lab-FBgn0000492 lab-FBgn0261930 mew-FBgn0003520 mew-pros mew-FBgn0021776 p24-1-FBgn0002561 E(spl)m3-HLH-FBgn0000137 E(spl)m3-HLH-FBgn0004170 E(spl)m3-HLH-pros E(spl)m3-HLH-FBgn0000022 E(spl)m3-HLH-FBgn0267821 Ptx1-FBgn0085424 hh-FBgn0261963 hh-FBgn0001269 hh-FBgn0000014 hh-FBgn0016977 hh-FBgn0000577 hh-FBgn0010382 hh-FBgn0000492 TpnC25D-FBgn0004647 Akap200-FBgn0003520 esg-FBgn0000137 esg-pros mle-FBgn0016977 mle-FBgn0003520 pdm2-FBgn0261963 pdm2-FBgn0004878 pdm2-FBgn0001269 pdm2-FBgn0025776 pdm2-FBgn0004170 pdm2-FBgn0000014 pdm2-FBgn0085424 pdm2-FBgn0000577 pdm2-FBgn0002973 pdm2-FBgn0000492 pdm2-FBgn0267821 pdm2-FBgn0261930 Mef2-FBgn0000014 mod(mdg4)-FBgn0025776 mod(mdg4)-FBgn0004170 mod(mdg4)-FBgn0000014 mod(mdg4)-FBgn0001325 mod(mdg4)-FBgn0000577 mod(mdg4)-FBgn0010382 CIC-a-FBgn0003520 CIC-a-pros CIC-a-FBgn0021776 CG1304-FBgn0004647 Pcl-FBgn0016977</p> |
| GO biological process | GO:0007400 | neuroblast fate determination | 26 | 0 | 0.01036 | 62 | 1 | pros | <p>pros-FBgn0003300 pros-FBgn0000014 pros-FBgn0016977 pros-FBgn0000577 pros-FBgn0003520 pros-FBgn0002973 pros-FBgn0010300 pros-FBgn0021776 pros-FBgn0000492 pros-FBgn0267821 pros-FBgn0261930 fz-FBgn0040080 fz-FBgn0003520 fz-FBgn0259984 fz-FBgn0002973 lab-FBgn0025776 lab-FBgn0000014 lab-FBgn0000577 lab-FBgn0000492 lab-FBgn0261930 mew-FBgn0003520 mew-pros mew-FBgn0021776 p24-1-FBgn0002561 E(spl)m3-HLH-FBgn0000137 E(spl)m3-HLH-FBgn0004170 E(spl)m3-HLH-pros E(spl)m3-HLH-FBgn0000022 E(spl)m3-HLH-FBgn0267821 hh-FBgn0001269 hh-FBgn0000014 hh-FBgn0016977 hh-FBgn0000577 hh-FBgn0010382 hh-FBgn0000492 TpnC25D-FBgn0004647 Akap200-FBgn0003520 esg-FBgn0000137 esg-pros mle-FBgn0016977 mle-FBgn0003520 pdm2-FBgn0001269 pdm2-FBgn0025776 pdm2-FBgn0004170 pdm2-FBgn0000014 pdm2-FBgn0000577 pdm2-FBgn0002973 pdm2-FBgn0000492 pdm2-FBgn0267821 pdm2-FBgn0261930 Mef2-FBgn0000014 mod(mdg4)-FBgn0025776 mod(mdg4)-FBgn0004170 mod(mdg4)-FBgn0000014 mod(mdg4)-FBgn0001325 mod(mdg4)-FBgn0000577 mod(mdg4)-FBgn0010382 CIC-a-FBgn0003520 CIC-a-pros CIC-a-FBgn0021776 CG1304-FBgn0004647 Pcl-FBgn0016977</p>                                                                                                                                                                        |

|                       |            |                                 |    |   |         |    |   |        |                                                                                                                                                                                                                                                                                                                                                                                                                                                                                                                                                                                                                                                                                                                                                                                                                                                                                                                      |
|-----------------------|------------|---------------------------------|----|---|---------|----|---|--------|----------------------------------------------------------------------------------------------------------------------------------------------------------------------------------------------------------------------------------------------------------------------------------------------------------------------------------------------------------------------------------------------------------------------------------------------------------------------------------------------------------------------------------------------------------------------------------------------------------------------------------------------------------------------------------------------------------------------------------------------------------------------------------------------------------------------------------------------------------------------------------------------------------------------|
| GO biological process | GO:0060070 | canonical Wnt signaling pathway | 11 | 0 | 0.01264 | 32 | 1 | fz     | wls-FBgn0000119 wls-FBgn0284084 pros-FBgn0284084 pros-FBgn0000499 fz-FBgn0085432 fz-FBgn0043900 fz-FBgn0039907 fz-FBgn0000117 fz-FBgn0000119 fz-FBgn0284084 fz-FBgn0000499 fz-FBgn0016797 Rala-fz mew-FBgn0000499 mew-FBgn0016797 fz3-FBgn0284084 hh-FBgn0000117 hh-FBgn0284084 hh-fz hh-FBgn0000499 hh-FBgn0016797 mthl8-FBgn0004360 Akap200-FBgn0000117 CG9394-FBgn0004360 esg-FBgn0039907 esg-FBgn0000119 esg-FBgn0284084 esg-FBgn0000499 pdm2-FBgn0000117 pdm2-FBgn0284084 Mipp1-fz Pcl-FBgn0043900                                                                                                                                                                                                                                                                                                                                                                                                              |
| GO biological process | GO:0014019 | neuroblast development          | 20 | 0 | 0.0113  | 52 | 1 | pdm2   | wls-FBgn0284084 pros-FBgn0261963 pros-FBgn0010109 pros-FBgn0004878 pros-FBgn0010300 pros-FBgn0284084 pros-FBgn0000014 pros-FBgn0003651 pros-FBgn0013469 pros-FBgn0261930 pros-FBgn0259986 pros-FBgn0002973 fz-FBgn0000117 fz-FBgn0284084 fz-FBgn0002973 lab-FBgn0000014 lab-FBgn0260642 lab-FBgn0261930 lab-pdm2 lab-FBgn0000576 E(spl)m3-HLH-FBgn0010109 E(spl)m3-HLH-FBgn0013469 fz3-FBgn0284084 hh-FBgn0261963 hh-FBgn0000117 hh-FBgn0284084 hh-FBgn0000014 hh-FBgn0260642 hh-FBgn0000576 TpnC25D-FBgn0004647 Akap200-FBgn0000117 esg-FBgn0284084 pdm2-FBgn0261963 pdm2-FBgn0010768 pdm2-FBgn0010109 pdm2-FBgn0004878 pdm2-FBgn0000117 pdm2-FBgn0284084 pdm2-FBgn0000014 pdm2-FBgn0003651 pdm2-FBgn0013469 pdm2-FBgn0003720 pdm2-FBgn0260642 pdm2-FBgn0261930 pdm2-FBgn0259986 pdm2-FBgn0000411 pdm2-FBgn0000576 pdm2-FBgn0002973 Mef2-FBgn0000014 mod(mdg4)-FBgn0000014 mod(mdg4)-FBgn0003651 CG1304-FBgn0004647 |
| GO biological process | GO:0035215 | genital disc development        | 13 | 0 | 0.01103 | 33 | 2 | esg hh | pros-FBgn0285896 pros-FBgn0000577 pros-esg fz-FBgn0285896 fz-hh fuss-FBgn0003716 lab-FBgn0000490 lab-FBgn0000251 lab-FBgn0000577 lab-FBgn0000157 lab-FBgn0000015 CTCF-FBgn0000251 Pvf1-FBgn0000490 hh-FBgn0005677 hh-FBgn0000490 hh-FBgn0000251 hh-FBgn0000577 hh-FBgn0003716 hh-FBgn0000157 hh-FBgn0014135 hh-FBgn0000504 hh-FBgn0000015 antr-FBgn0000015 Akap200-hh mle-FBgn0000504 pdm2-FBgn0000251 pdm2-FBgn0000577 pdm2-FBgn0000157 pdm2-FBgn0000015 mod(mdg4)-FBgn0000577 mod(mdg4)-FBgn0000504 Tep2-FBgn0000490 Pcl-FBgn0000015                                                                                                                                                                                                                                                                                                                                                                               |

|                       |            |                                                         |    |   |         |    |   |    |                                                                                                                                                                                                                                                                                                                                                                                                                                                                                                                                                                                                                                                                                                                                                                                                                                                                                                                                                                                                                                                                                      |
|-----------------------|------------|---------------------------------------------------------|----|---|---------|----|---|----|--------------------------------------------------------------------------------------------------------------------------------------------------------------------------------------------------------------------------------------------------------------------------------------------------------------------------------------------------------------------------------------------------------------------------------------------------------------------------------------------------------------------------------------------------------------------------------------------------------------------------------------------------------------------------------------------------------------------------------------------------------------------------------------------------------------------------------------------------------------------------------------------------------------------------------------------------------------------------------------------------------------------------------------------------------------------------------------|
| GO biological process | GO:0009996 | negative regulation of cell fate specification          | 15 | 0 | 0.01275 | 44 | 0 |    | wls-FBgn0284084 pros-FBgn0262866 pros-FBgn0000097 pros-FBgn0284084 pros-FBgn0004837 pros-FBgn0003118 pros-FBgn0000320 pros-FBgn0000547 pros-FBgn0003963 pros-FBgn0015371 pros-FBgn0261648 pros-FBgn0259176 fz-FBgn0000097 fz-FBgn0284084 fz-FBgn0004837 fz-FBgn0003118 fz-FBgn0000547 fz-FBgn0028387 Rala-FBgn0000097 Rala-FBgn0028582 Rala-FBgn0003118 lab-FBgn0000015 lab-FBgn0000606 CTCF-FBgn0000606 E(spl)m3-HLH-FBgn0259176 fz3-FBgn0284084 hh-FBgn0284084 hh-FBgn0000015 hh-FBgn0003118 hh-FBgn0000320 hh-FBgn0000547 hh-FBgn0000606 hh-FBgn0003963 CG1894-FBgn0028387 antr-FBgn0000015 Akap200-FBgn0262866 esg-FBgn0262866 esg-FBgn0284084 esg-FBgn0003963 mle-FBgn0000097 pdm2-FBgn0284084 pdm2-FBgn0000015 pdm2-FBgn0000606 Pcl-FBgn0000015                                                                                                                                                                                                                                                                                                                                |
| GO biological process | GO:0007448 | anterior/posterior pattern specification, imaginal disc | 25 | 0 | 0.0113  | 65 | 1 | hh | wls-FBgn0284084 pros-FBgn0284084 pros-FBgn0000014 pros-FBgn0004197 pros-FBgn0000463 pros-FBgn0000577 fz-FBgn0284084 fz-FBgn0003444 fz-hh fz-FBgn0000463 fz-FBgn0263930 fuss-FBgn0011648 fuss-FBgn0003716 fuss-FBgn0003396 fuss-FBgn0003317 fuss-FBgn0020493 Rala-FBgn0000463 lab-FBgn0000251 lab-FBgn0000014 lab-FBgn0000015 lab-FBgn0000490 lab-FBgn0000577 mew-FBgn0000463 mew-FBgn0263930 CTCF-FBgn0000251 fz3-FBgn0284084 Pvf1-FBgn0000490 hh-FBgn0011648 hh-FBgn0001269 hh-FBgn0040271 hh-FBgn0003892 hh-FBgn0000251 hh-FBgn0284084 hh-FBgn0004859 hh-FBgn0003716 hh-FBgn0000273 hh-FBgn0003444 hh-FBgn0000014 hh-FBgn0004197 hh-FBgn0000179 hh-FBgn0000015 hh-FBgn0000463 hh-FBgn0263930 hh-FBgn0003396 hh-FBgn0000490 hh-FBgn0000577 antr-FBgn0000015 drm-FBgn0004197 Akap200-FBgn0000273 Akap200-FBgn0003444 Akap200-hh esg-FBgn0284084 pdm2-FBgn0001269 pdm2-FBgn0000251 pdm2-FBgn0284084 pdm2-FBgn0000014 pdm2-FBgn0000015 pdm2-FBgn0000577 Mef2-FBgn0004859 Mef2-FBgn0000014 mod(mdg4)-FBgn0000014 mod(mdg4)-FBgn0000577 Tep2-FBgn0000490 Pcl-FBgn0052133 Pcl-FBgn0000015 |

|                       |               |                                          |    |   |         |    |   |      |                                                                                                                                                                                                                                                                                                                                                                                                                                                                                                                                                                                                                                                                                                                                                                                                                                                                                                                                                                                                                                                                                                                                                                                                                                                                                                                                                                                                                                                                                                                                                                                                                                                                                                                                                                                                                                                                                                                                                      |
|-----------------------|---------------|------------------------------------------|----|---|---------|----|---|------|------------------------------------------------------------------------------------------------------------------------------------------------------------------------------------------------------------------------------------------------------------------------------------------------------------------------------------------------------------------------------------------------------------------------------------------------------------------------------------------------------------------------------------------------------------------------------------------------------------------------------------------------------------------------------------------------------------------------------------------------------------------------------------------------------------------------------------------------------------------------------------------------------------------------------------------------------------------------------------------------------------------------------------------------------------------------------------------------------------------------------------------------------------------------------------------------------------------------------------------------------------------------------------------------------------------------------------------------------------------------------------------------------------------------------------------------------------------------------------------------------------------------------------------------------------------------------------------------------------------------------------------------------------------------------------------------------------------------------------------------------------------------------------------------------------------------------------------------------------------------------------------------------------------------------------------------------|
| GO biological process | GO:0048864    | stem cell development                    | 21 | 0 | 0.01076 | 52 | 1 | pdm2 | <p>wls-FBgn0284084 pros-FBgn0261963 pros-FBgn0010109 pros-FBgn0004878 pros-FBgn0010300 pros-FBgn0284084 pros-FBgn0000014 pros-FBgn0003651 pros-FBgn0013469 pros-FBgn0261930 pros-FBgn0259986 pros-FBgn0002973 fz-FBgn0000117 fz-FBgn0284084 fz-FBgn0002973 lab-FBgn0000014 lab-FBgn0260642 lab-FBgn0261930 lab-pdm2 lab-FBgn0000576 E(sp1)m3-HLH-FBgn0010109 E(sp1)m3-HLH-FBgn0013469 fz3-FBgn0284084 hh-FBgn0261963 hh-FBgn0000117 hh-FBgn0284084 hh-FBgn0000014 hh-FBgn0260642 hh-FBgn0000576 TpnC25D-FBgn0004647 Akap200-FBgn0000117 esg-FBgn0284084 pdm2-FBgn0261963 pdm2-FBgn0010768 pdm2-FBgn0010109 pdm2-FBgn0004878 pdm2-FBgn0000117 pdm2-FBgn0284084 pdm2-FBgn0000014 pdm2-FBgn0003651 pdm2-FBgn0013469 pdm2-FBgn0003720 pdm2-FBgn0260642 pdm2-FBgn0261930 pdm2-FBgn0259986 pdm2-FBgn0000411 pdm2-FBgn0000576 pdm2-FBgn0002973 Mef2-FBgn0000014 mod(mdg4)-FBgn0000014 mod(mdg4)-FBgn0003651 CG1304-FBgn0004647</p> <p>pros-FBgn0004657 pros-FBgn0001250 fz-FBgn0004657 fz-FBgn0001250 fuss-FBgn0039914 lab-FBgn0000490 mew-FBgn0010395 mew-FBgn0004657 mew-FBgn0001250 Pvf1-FBgn0039914 Pvf1-FBgn0000490 Pvf1-FBgn0031461 Pvf1-FBgn0005590 hh-FBgn0000490 hh-FBgn0004657 hh-FBgn0005590 CIC-a-FBgn0004657 CIC-a-FBgn0001250 Tep2-FBgn0039914 Tep2-FBgn0000490 Tep2-FBgn0031461 Tep2-FBgn0005590</p> <p>wls-FBgn0004635 wls-FBgn0003310 wls-FBgn0284084 pros-FBgn0003118 pros-FBgn0003731 pros-FBgn0284084 pros-FBgn0000014 fz-FBgn0003118 fz-FBgn0003731 fz-FBgn0284084 Rala-FBgn0003118 lab-FBgn0000014 lab-FBgn0000015 mew-FBgn0004635 mew-FBgn0003731 E(sp1)m3-HLH-FBgn0004666 fz3-FBgn0284084 Pvf1-FBgn0003731 Pvf1-FBgn0005672 hh-FBgn0004635 hh-FBgn0003118 hh-FBgn0003731 hh-FBgn0005672 hh-FBgn0003892 hh-FBgn0003310 hh-FBgn0284084 hh-FBgn0000014 hh-FBgn0000015 antr-FBgn0000015 esg-FBgn0284084 pdm2-FBgn0284084 pdm2-FBgn0000014 pdm2-FBgn0000015 Mef2-FBgn0000014 mod(mdg4)-FBgn0000014 CIC-a-FBgn0003731 Pcl-FBgn0000015</p> |
| Reactome pathway      | R-DME-1566948 | Elastic fibre formation                  | 9  | 0 | 0.01062 | 22 | 0 |      |                                                                                                                                                                                                                                                                                                                                                                                                                                                                                                                                                                                                                                                                                                                                                                                                                                                                                                                                                                                                                                                                                                                                                                                                                                                                                                                                                                                                                                                                                                                                                                                                                                                                                                                                                                                                                                                                                                                                                      |
| GO biological process | GO:0035225    | determination of genital disc primordium | 10 | 0 | 0.01608 | 37 | 0 |      |                                                                                                                                                                                                                                                                                                                                                                                                                                                                                                                                                                                                                                                                                                                                                                                                                                                                                                                                                                                                                                                                                                                                                                                                                                                                                                                                                                                                                                                                                                                                                                                                                                                                                                                                                                                                                                                                                                                                                      |

|                       |            |                       |    |   |         |    |   |           |                                                                                                                                                                                                                                                                                                                                                                                                                                                                                                                                                                                                                                                                                                                                                                                                                                                                                                                                                                                                                                                                                                                                                                                                                                                                                                                                                                                                                                                                                                                                                                                                                                                                                                                                                                                                                                                                                                                                                                                                                                                             |
|-----------------------|------------|-----------------------|----|---|---------|----|---|-----------|-------------------------------------------------------------------------------------------------------------------------------------------------------------------------------------------------------------------------------------------------------------------------------------------------------------------------------------------------------------------------------------------------------------------------------------------------------------------------------------------------------------------------------------------------------------------------------------------------------------------------------------------------------------------------------------------------------------------------------------------------------------------------------------------------------------------------------------------------------------------------------------------------------------------------------------------------------------------------------------------------------------------------------------------------------------------------------------------------------------------------------------------------------------------------------------------------------------------------------------------------------------------------------------------------------------------------------------------------------------------------------------------------------------------------------------------------------------------------------------------------------------------------------------------------------------------------------------------------------------------------------------------------------------------------------------------------------------------------------------------------------------------------------------------------------------------------------------------------------------------------------------------------------------------------------------------------------------------------------------------------------------------------------------------------------------|
| GO biological process | GO:0035326 | enhancer binding      | 32 | 0 | 0.01114 | 82 | 2 | lab Mef2  | <p>pros-r Bgn00038 /0 pros-r Bgn000009 / pros-r Bgn000483 / pros-FBgn0000014 pros-FBgn0000577 pros-FBgn0010109 pros-FBgn0005561 pros-FBgn0002735 pros-FBgn0001235 pros-FBgn0013469 FoxK-Mef2 fz-FBgn0000097 fz-FBgn0004837 fz-FBgn0085432 fuss-FBgn0011648 Rala-FBgn0000097 lab-FBgn0086680 lab-FBgn0003896 lab-FBgn0000014 lab-FBgn0004110 lab-FBgn0000015 lab-FBgn0005558 lab-FBgn0000577 lab-FBgn0000606 lab-FBgn0000576 lab-FBgn0003944 lab-FBgn0005561 lab-FBgn0001235 lab-FBgn0000611 CTCF-FBgn0000606 E(spl)m3-HLH-FBgn0010109 E(spl)m3-HLH-FBgn0002735 E(spl)m3-HLH-FBgn0013469 Ptx1-FBgn0005558 hh-FBgn0011648 hh-FBgn0003896 hh-FBgn0000014 hh-FBgn0004110 hh-FBgn0000015 hh-FBgn0001077 hh-FBgn0005558 hh-FBgn0000577 hh-FBgn0000606 hh-FBgn0000576 hh-FBgn0003345 hh-FBgn0001235 hh-FBgn0001150 antr-FBgn0000015 esg-FBgn0003896 REPTOR-BP-FBgn0001150 mle-FBgn0003870 mle-FBgn0000097 mle-FBgn0002521 pdm2-FBgn0086680 pdm2-FBgn0003896 pdm2-FBgn0000014 pdm2-FBgn0004110 pdm2-FBgn0000015 pdm2-FBgn0001077 pdm2-FBgn0005558 pdm2-FBgn0000577 pdm2-lab pdm2-FBgn0000606 pdm2-FBgn0000576 pdm2-FBgn0003944 pdm2-FBgn0010109 pdm2-FBgn0005561 pdm2-FBgn0000611 pdm2-FBgn0013469 Mef2-FBgn0000014 Mef2-FBgn0003345 Mef2-FBgn0003002 Mef2-FBgn0001150 Xbp1-FBgn0004396 Xbp1-FBgn0000370 Xbp1-FBgn0001150 mod(mdg4)-FBgn0003870 mod(mdg4)-FBgn0000014 mod(mdg4)-FBgn0004110 mod(mdg4)-FBgn0000577 mod(mdg4)-</p> <p>pros-mew pros-FBgn0034072 pros-CIC-a pros-FBgn0266672 pros-FBgn0004657 pros-FBgn0021776 pros-FBgn0261574 pros-FBgn0003520 pros-FBgn0001250 pros-FBgn0000464 fz-FBgn0034072 fz-FBgn0004657 fz-FBgn0261574 fz-FBgn0003520 fz-FBgn0001250 fz-FBgn0000464 mew-FBgn0034072 mew-CIC-a mew-FBgn0266672 mew-FBgn0004657 mew-FBgn0021776 mew-FBgn0261574 mew-FBgn0003520 mew-FBgn0001250 mew-FBgn0000464 hh-FBgn0004657 hh-FBgn0003892 Akap200-FBgn0003520 mle-FBgn0003520 Mipp1-FBgn0000464 CIC-a-mew CIC-a-FBgn0034072 CIC-a-FBgn0266672 CIC-a-FBgn0004657 CIC-a-FBgn0021776 CIC-a-FBgn0261574 CIC-a-FBgn0003520 CIC-a-FBgn0001250</p> |
| GO biological process | GO:0009925 | basal plasma membrane | 11 | 0 | 0.01501 | 38 | 2 | mew CIC-a |                                                                                                                                                                                                                                                                                                                                                                                                                                                                                                                                                                                                                                                                                                                                                                                                                                                                                                                                                                                                                                                                                                                                                                                                                                                                                                                                                                                                                                                                                                                                                                                                                                                                                                                                                                                                                                                                                                                                                                                                                                                             |

GO biological process GO:0035223 leg disc pattern formation 22 0 0.01086 55 0

Sesn-FBgn0003256|wls-FBgn0000119|wls-FBgn0003295|wls-FBgn0004635|pros-FBgn0261963|pros-FBgn0003295|pros-FBgn0001235|pros-FBgn0003118|pros-FBgn0003731|fz-FBgn0003205|fz-FBgn0039907|fz-FBgn0000119|fz-FBgn0003118|fz-FBgn0003731|Rala-FBgn0003205|Rala-FBgn0003118|lab-FBgn0011758|lab-FBgn0000157|lab-FBgn0267978|lab-FBgn0001235|lab-FBgn0000490|mew-FBgn0004635|mew-FBgn0003731|CTCF-FBgn0267978|Pvf1-FBgn0000490|Pvf1-FBgn0003731|Pvf1-FBgn0003984|hh-FBgn0003256|hh-FBgn0261963|hh-FBgn0005677|hh-FBgn0003205|hh-FBgn0011758|hh-FBgn0026411|hh-FBgn0000157|hh-FBgn0267978|hh-FBgn0004854|hh-FBgn0001235|hh-FBgn0004635|hh-FBgn0003118|hh-FBgn0000490|hh-FBgn0003731|hh-FBgn0003866|hh-FBgn0003984|hh-FBgn0086655|drm-FBgn0267978|esg-FBgn0039907|esg-FBgn0000119|pdm2-FBgn0261963|pdm2-FBgn0011758|pdm2-FBgn0000157|pdm2-FBgn0267978|pdm2-FBgn0004854|CIC-a-FBgn0003731|Tep2-FBgn0000490|Pcl-FBgn0086655
